# Supplementary material
Source: PubMed Central journal article supplement (PMC3447103)
Supplement: NIHMS400525-supplement-1_si_001.pdf [file NIHMS400525-supplement-1_si_001.pdf]

# Synthesis and Preclinical Evaluation of Bifunctional Ligands for Improved Chelation Chemistry of $^{90}\text{Y}$ and $^{177}\text{Lu}$ for Targeted Radioimmunotherapy

Chi Soo Kang,<sup>1</sup> Xiang Sun,<sup>1</sup> Fang Jia,<sup>2</sup> Hyun A Song,<sup>1</sup> Yunwei Chen,<sup>1</sup>  
Michael Lewis,<sup>2</sup> Hyun-Soon Chong<sup>1,\*</sup>

## Supporting Information

### **A. TLC and HPLC chromatograms for radiolabeling kinetics studies**

#### **1. Radiolabeling of ligand-trastuzumab conjugate with $^{90}\text{Y}$**

- i) 3p-C-NETA-trastuzumab (HPLC method 1), pages 2-4
- ii) 3p-C-DEPA-trastuzumab (HPLC method 1), pages 5-7
- iii) C-DTPA-trastuzumab (HPLC method 1), pages 8-10
- iv) C-DOTA-trastuzumab (HPLC method 2), pages 11-13

#### **2. Radiolabeling of ligand-trastuzumab conjugate with $^{177}\text{Lu}$**

- i) 3p-C-NETA-trastuzumab (HPLC method 2), pages 14-16
- ii) 3p-C-DEPA-trastuzumab (HPLC methods 2 and 3), pages 17-19
- iii) C-DTPA-trastuzumab (HPLC method 2), pages 20-22
- iv) C-DOTA-trastuzumab (HPLC method 2), pages 23-25

### **B. HPLC chromatograms for serum stability studies (37 °C, pH 7, human serum).**

#### **1. $^{90}\text{Y}$ -radiolabeled trastuzumab conjugates**

- i)  $^{90}\text{Y}$ -3p-C-NETA-trastuzumab (HPLC method 2), pages 26-29
- ii)  $^{90}\text{Y}$ -3p-C-DEPA-trastuzumab (HPLC methods 1 and 3), page 30
- iii)  $^{90}\text{Y}$ -C-DOTA-trastuzumab (HPLC method 2), pages 31-34

#### **2. $^{177}\text{Lu}$ -radiolabeled trastuzumab conjugates**

- i)  $^{177}\text{Lu}$ -3p-C-NETA-trastuzumab (HPLC method 2), pages 35-39
- ii)  $^{177}\text{Lu}$ -3p-C-DEPA-trastuzumab (HPLC method 2), page 40
- iii)  $^{177}\text{Lu}$ -C-DOTA-trastuzumab (HPLC methods 2 and 3), pages 41-44

### **C. *In vivo* biodistribution and tumor uptake data, page 45**

# A. ITLC and HPLC chromatograms for radiolabeling kinetics studies

## 1. Radiolabeling of Ligand-Trastuzumab Conjugate with $^{90}\text{Y}$

### i) 3p-C-NETA-trastuzumab

#### Sample 1

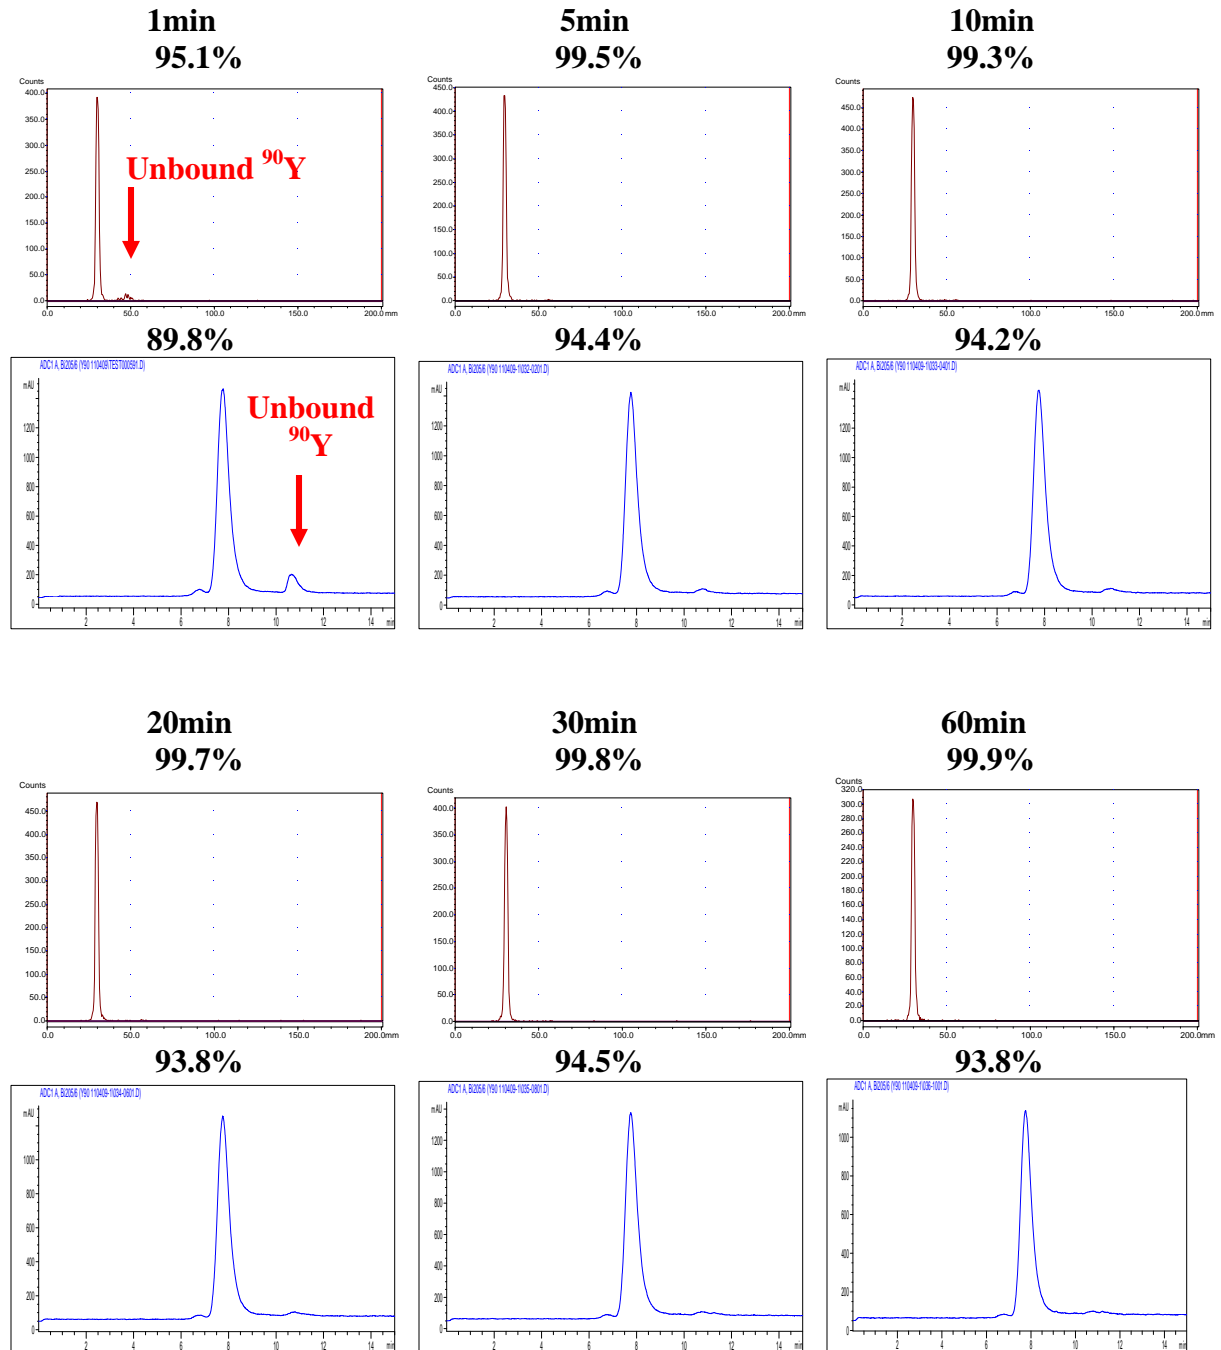

## Sample 2

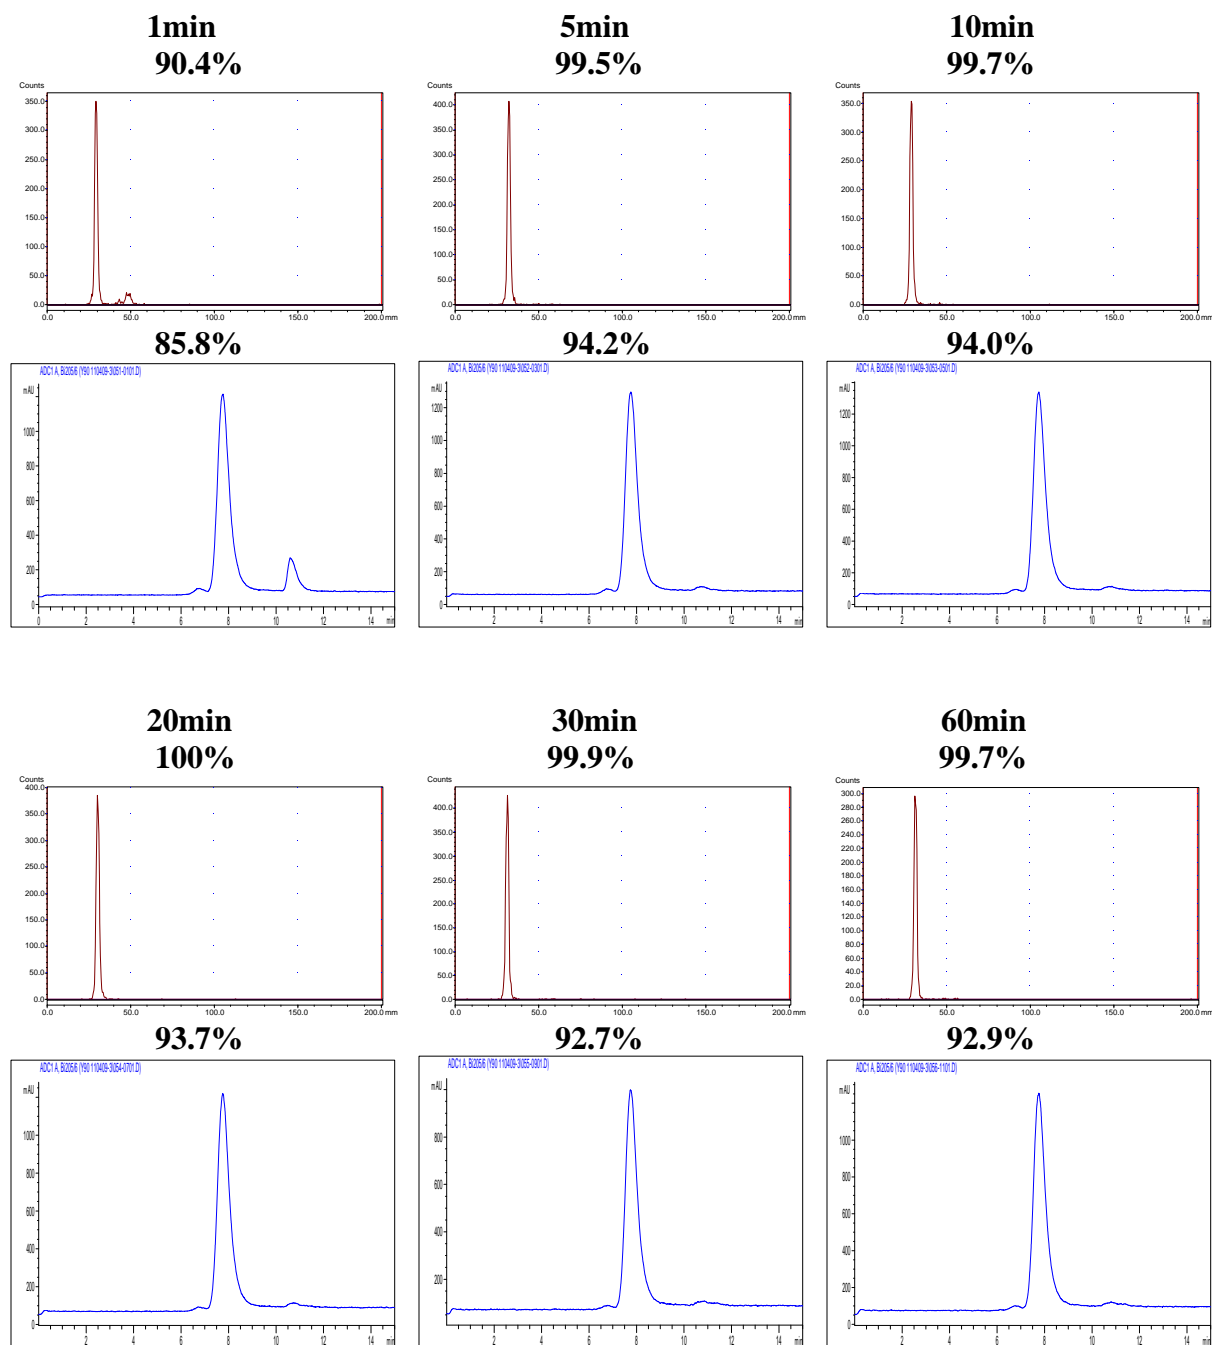

### Sample 3

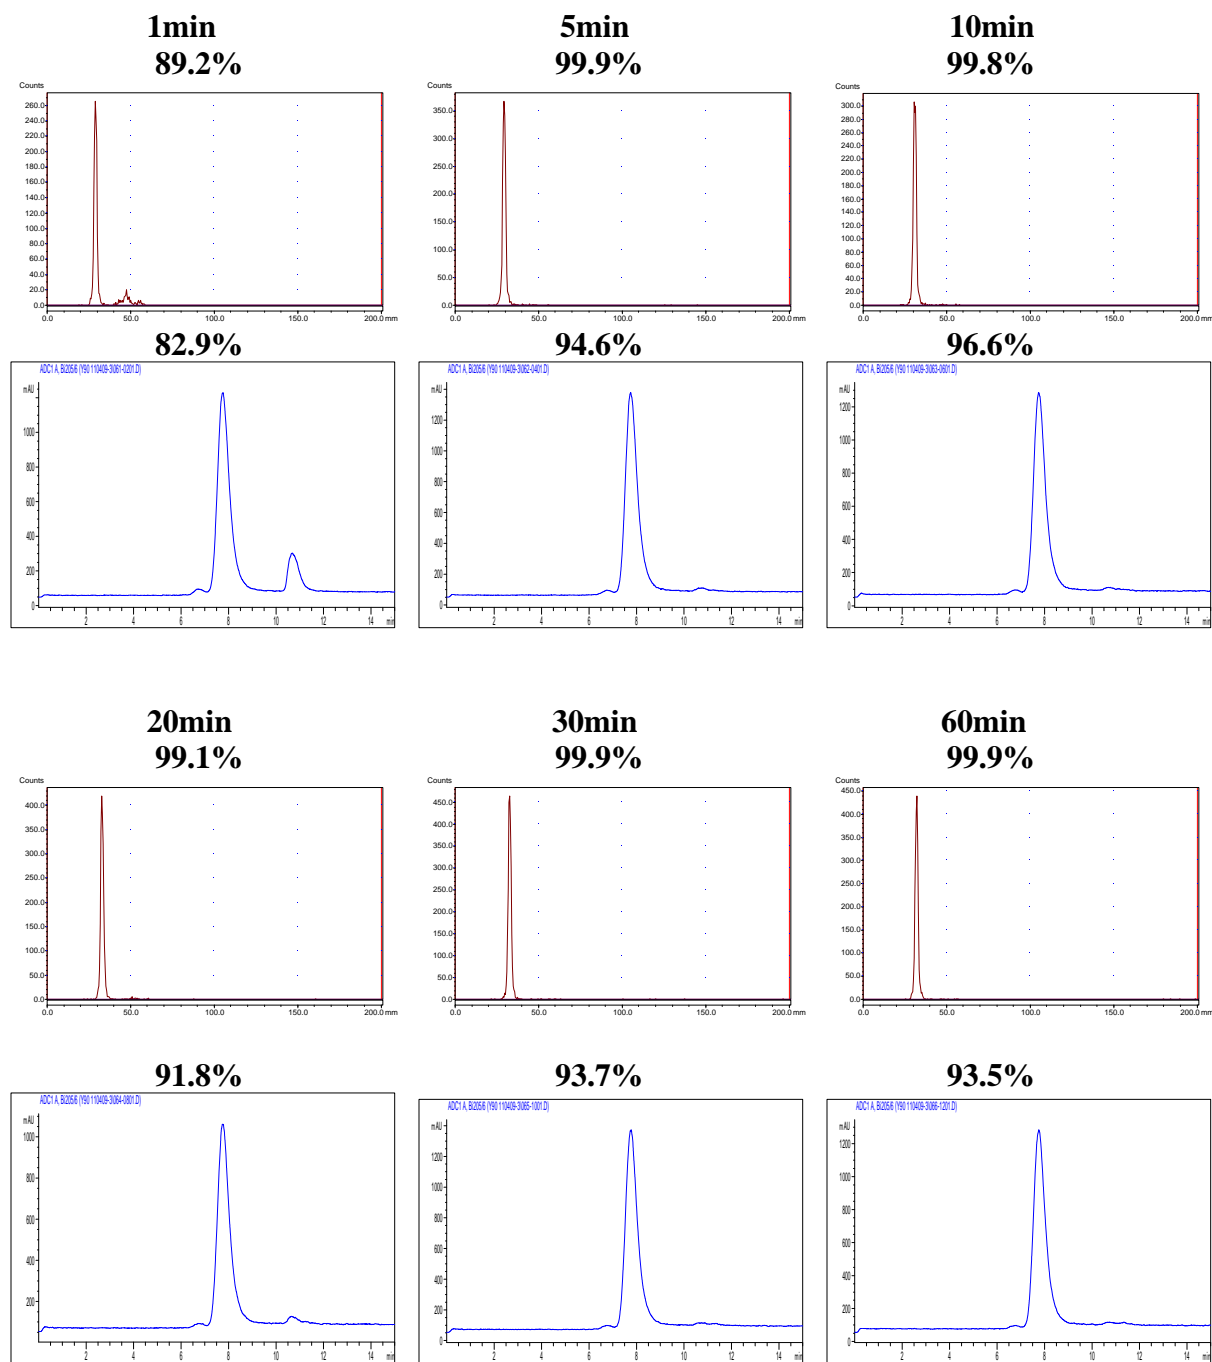

ii) 3p-C-DEPA-trastuzumab

**Sample 1**

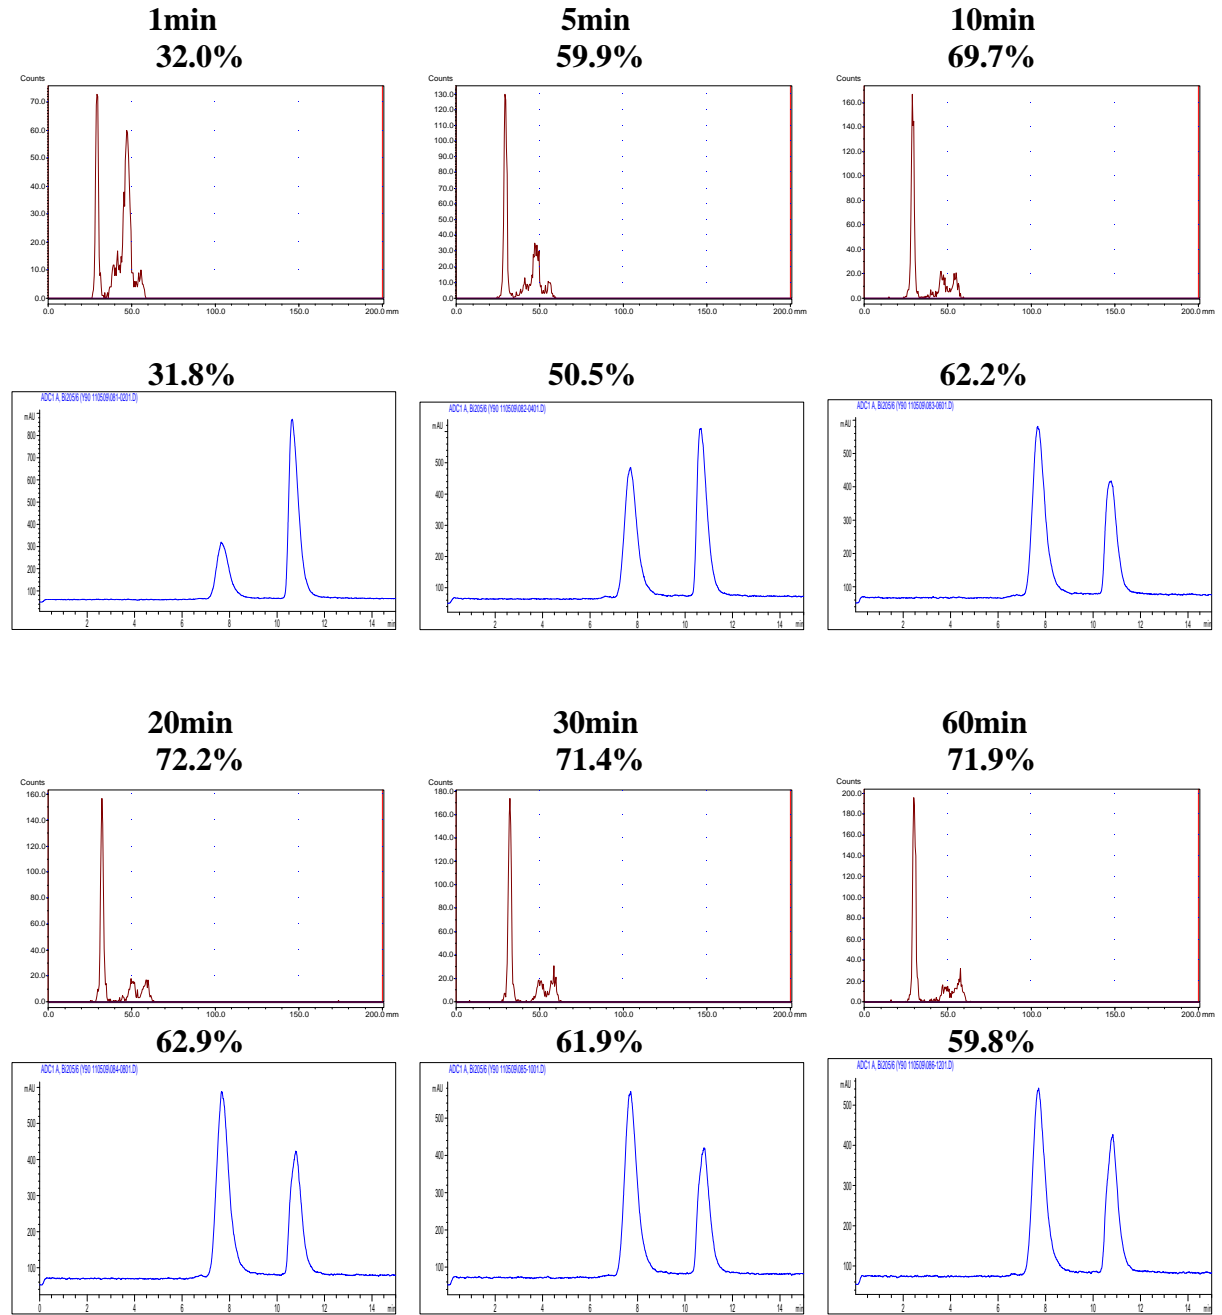

# Sample 2

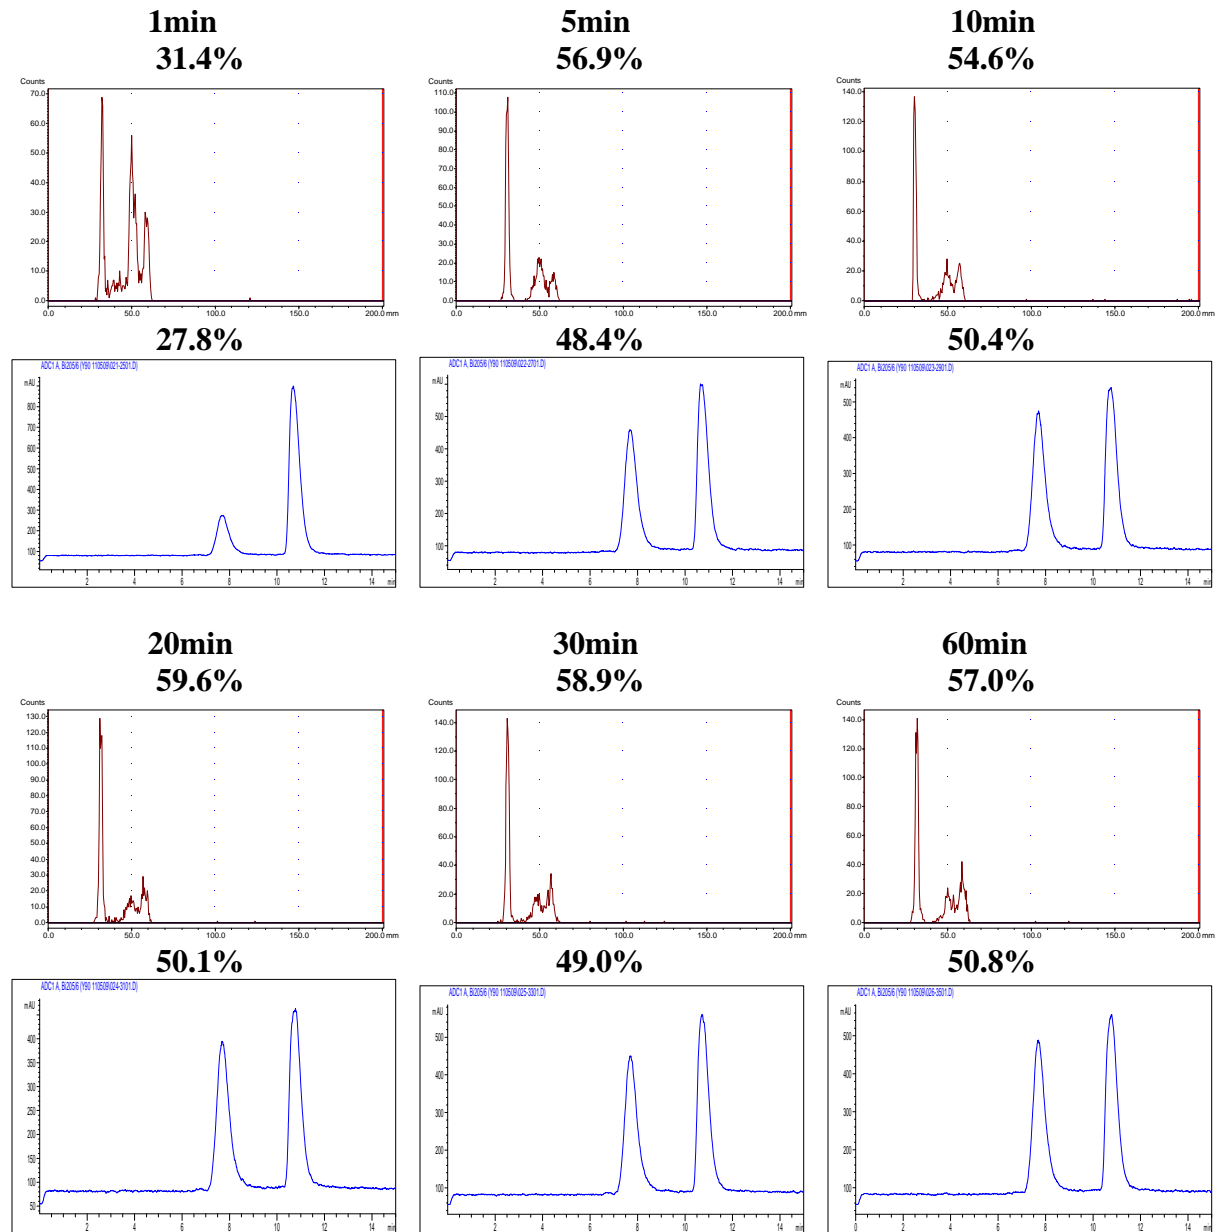

# Sample 3

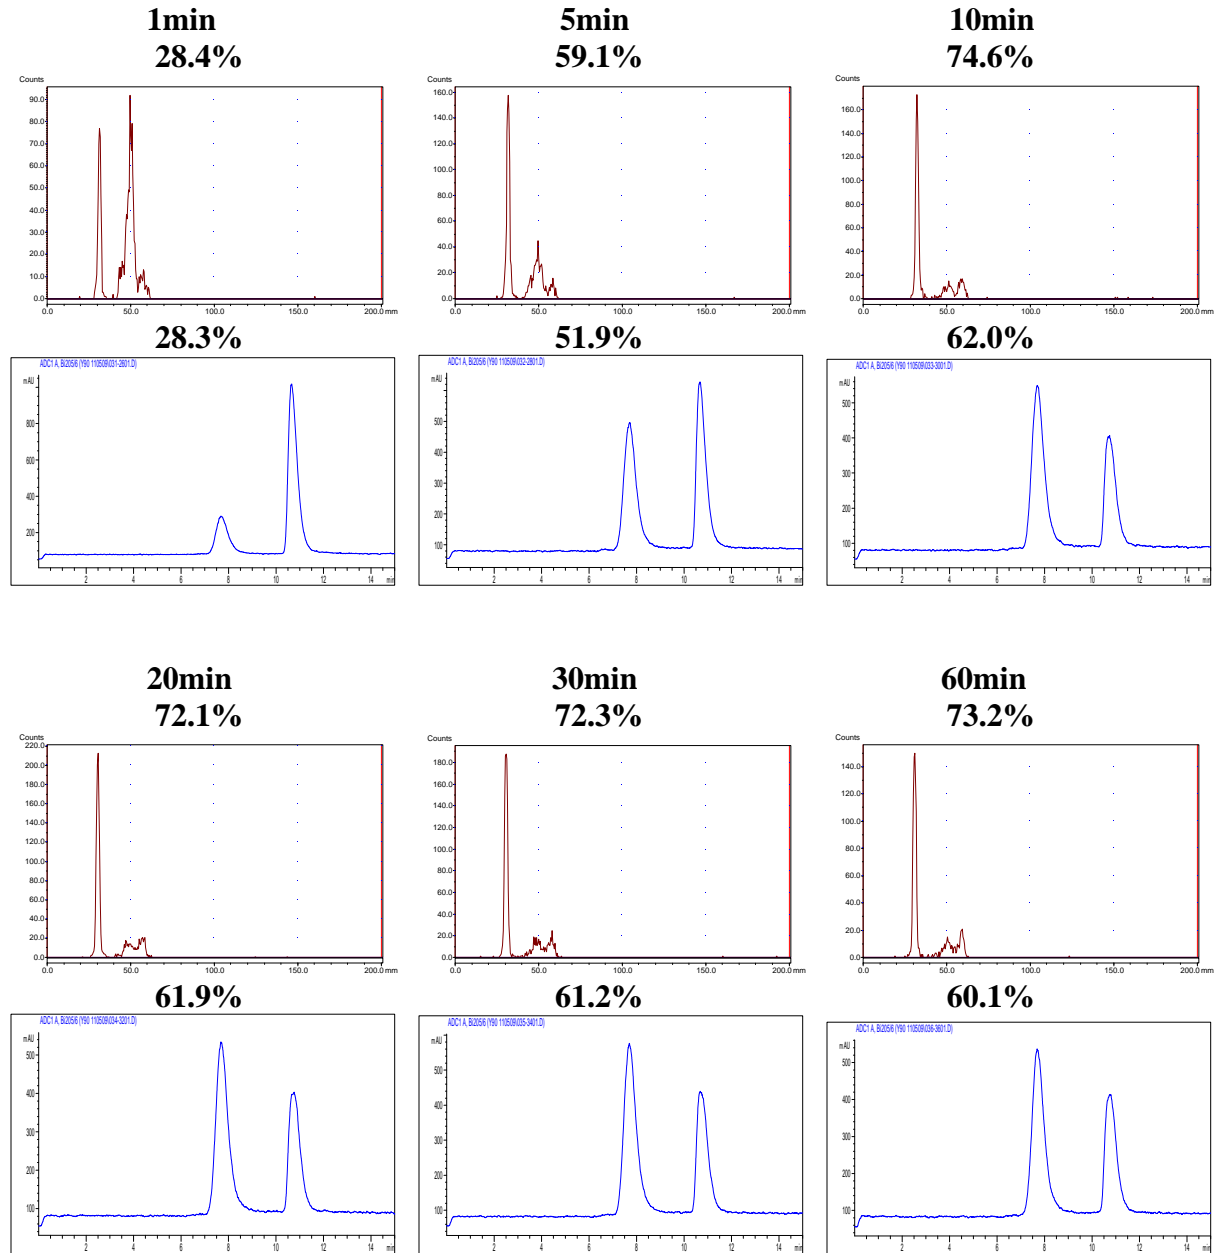

### iii) C-DTPA-trastuzumab

#### Sample 1

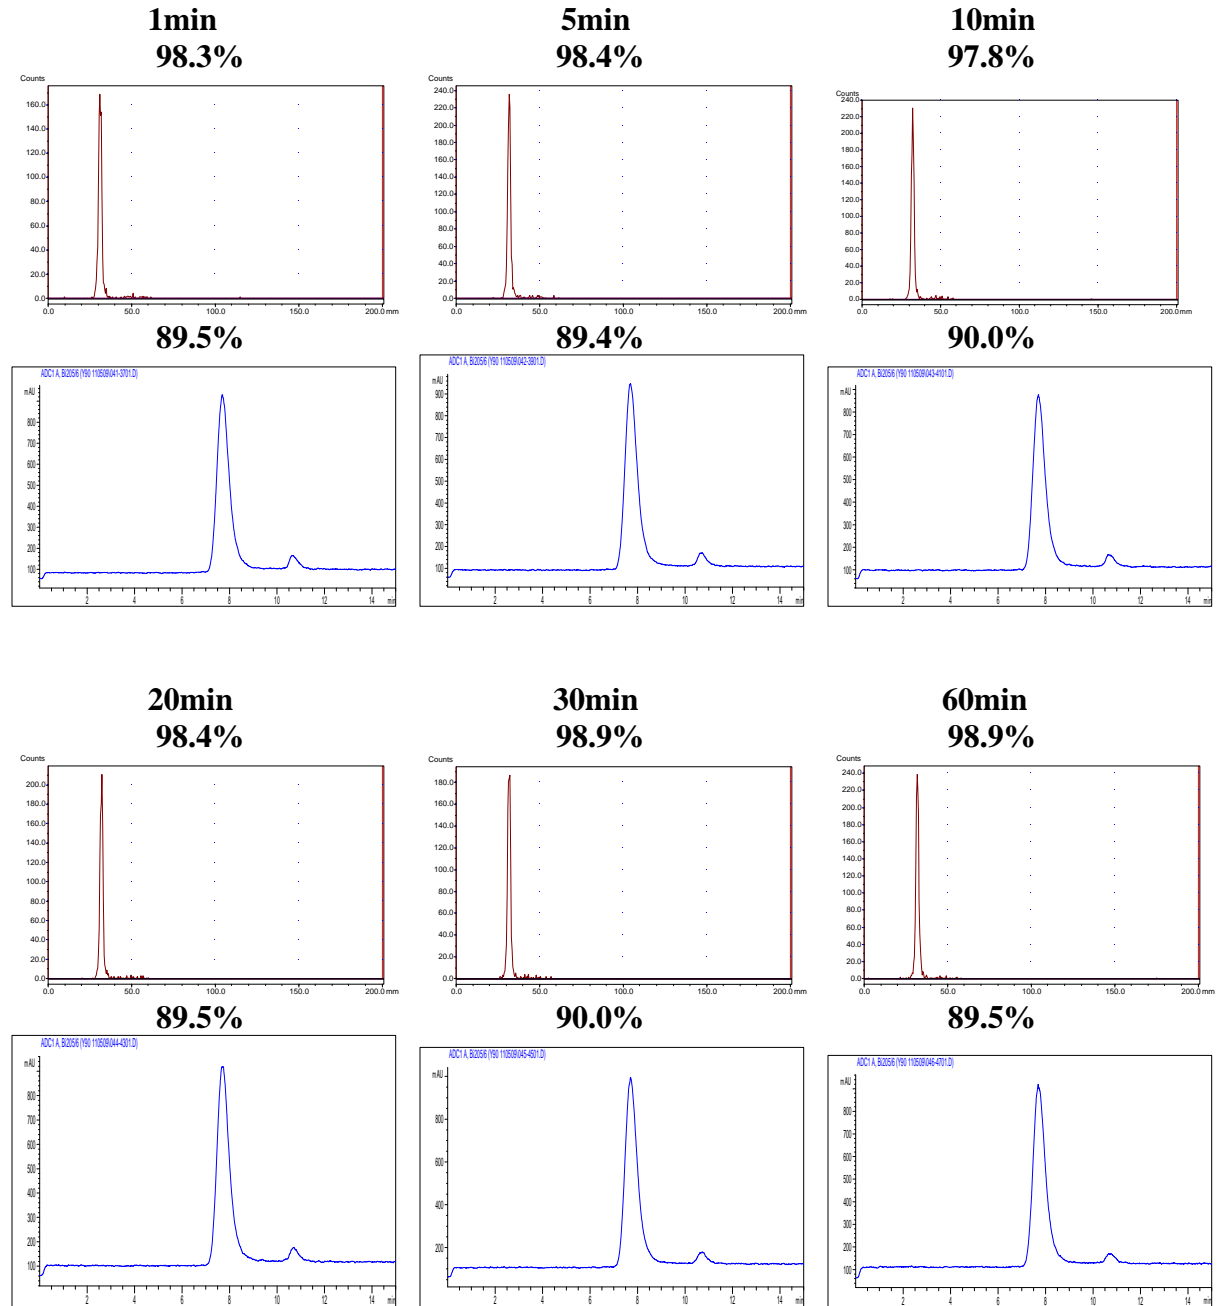



# Sample 2

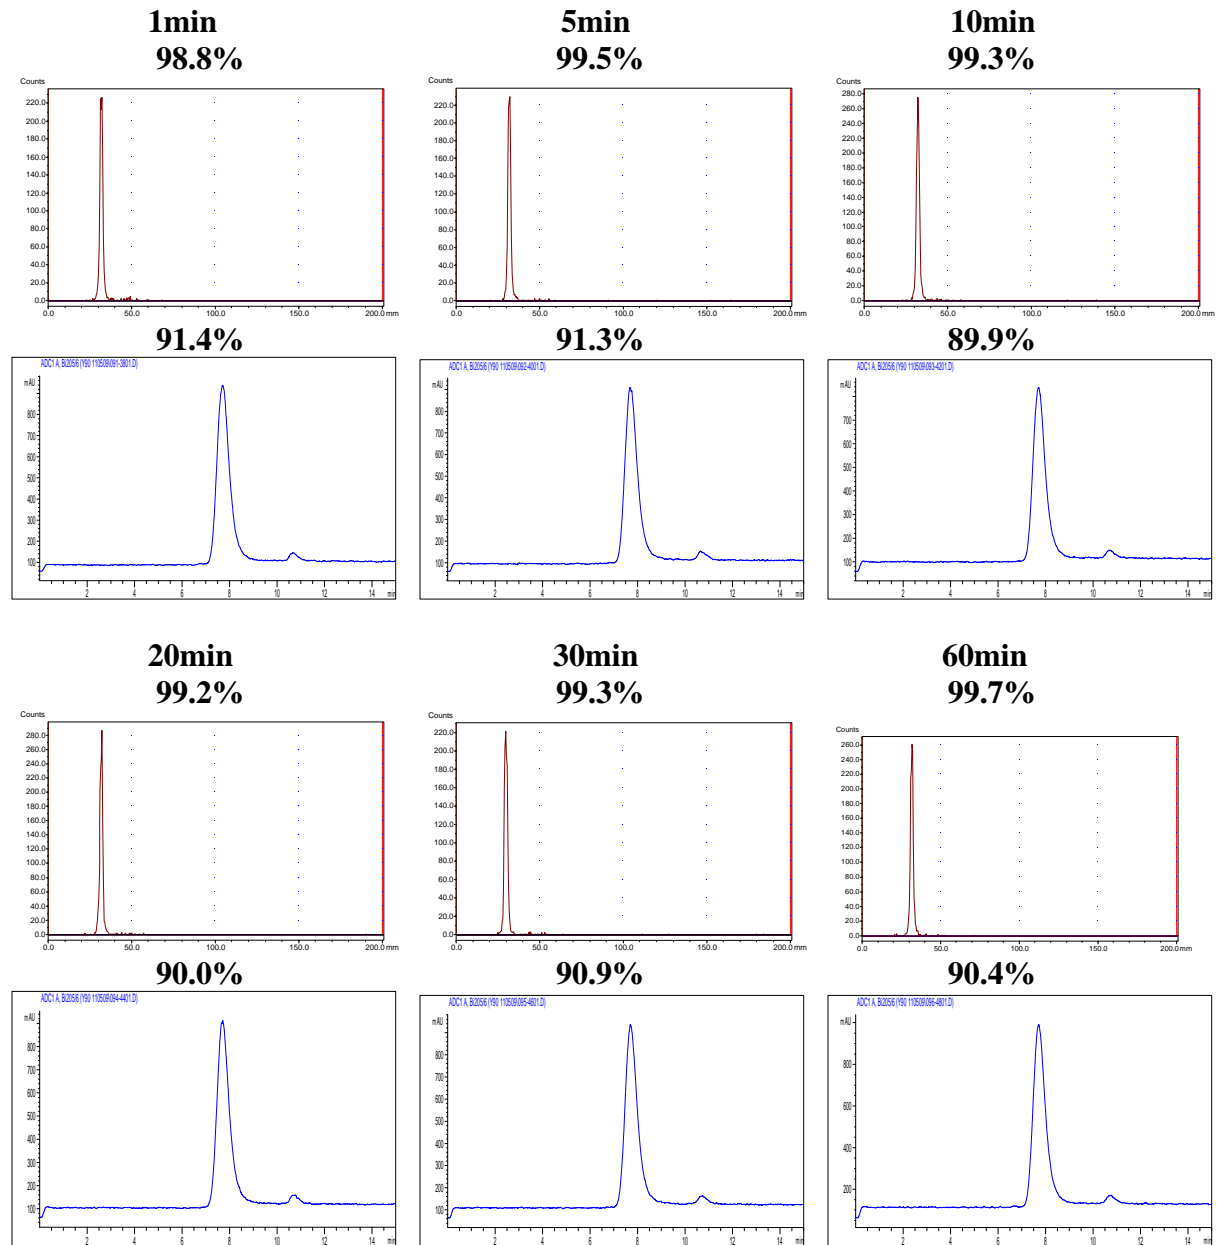

# Sample 3

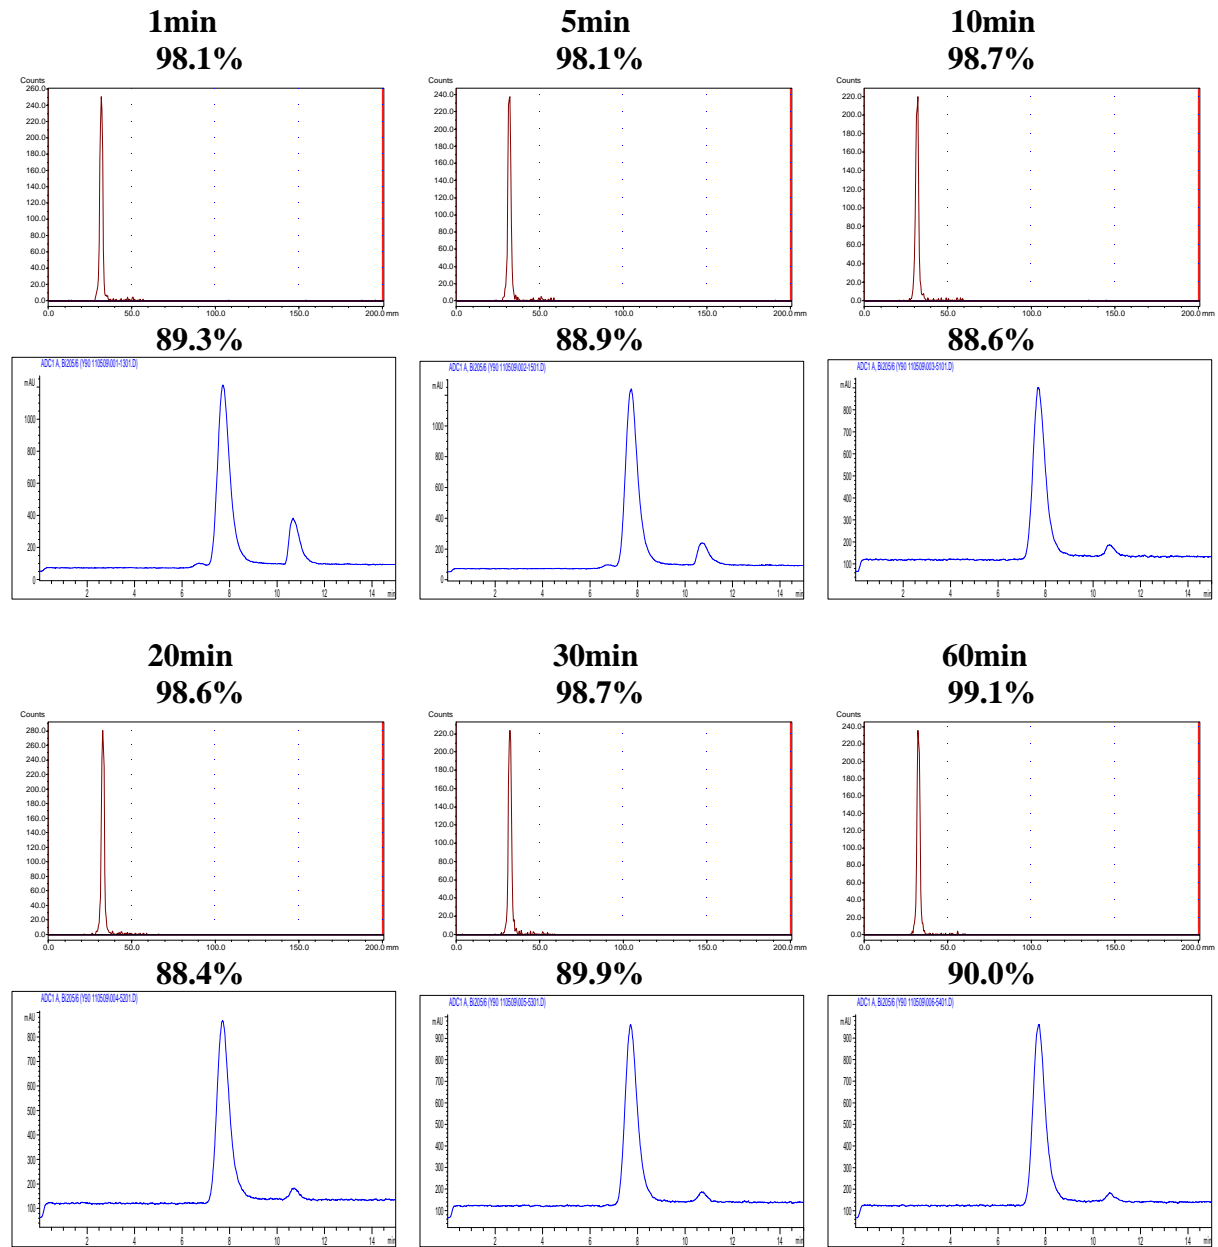

iv) C-DOTA-trastuzumab

**Sample 1**

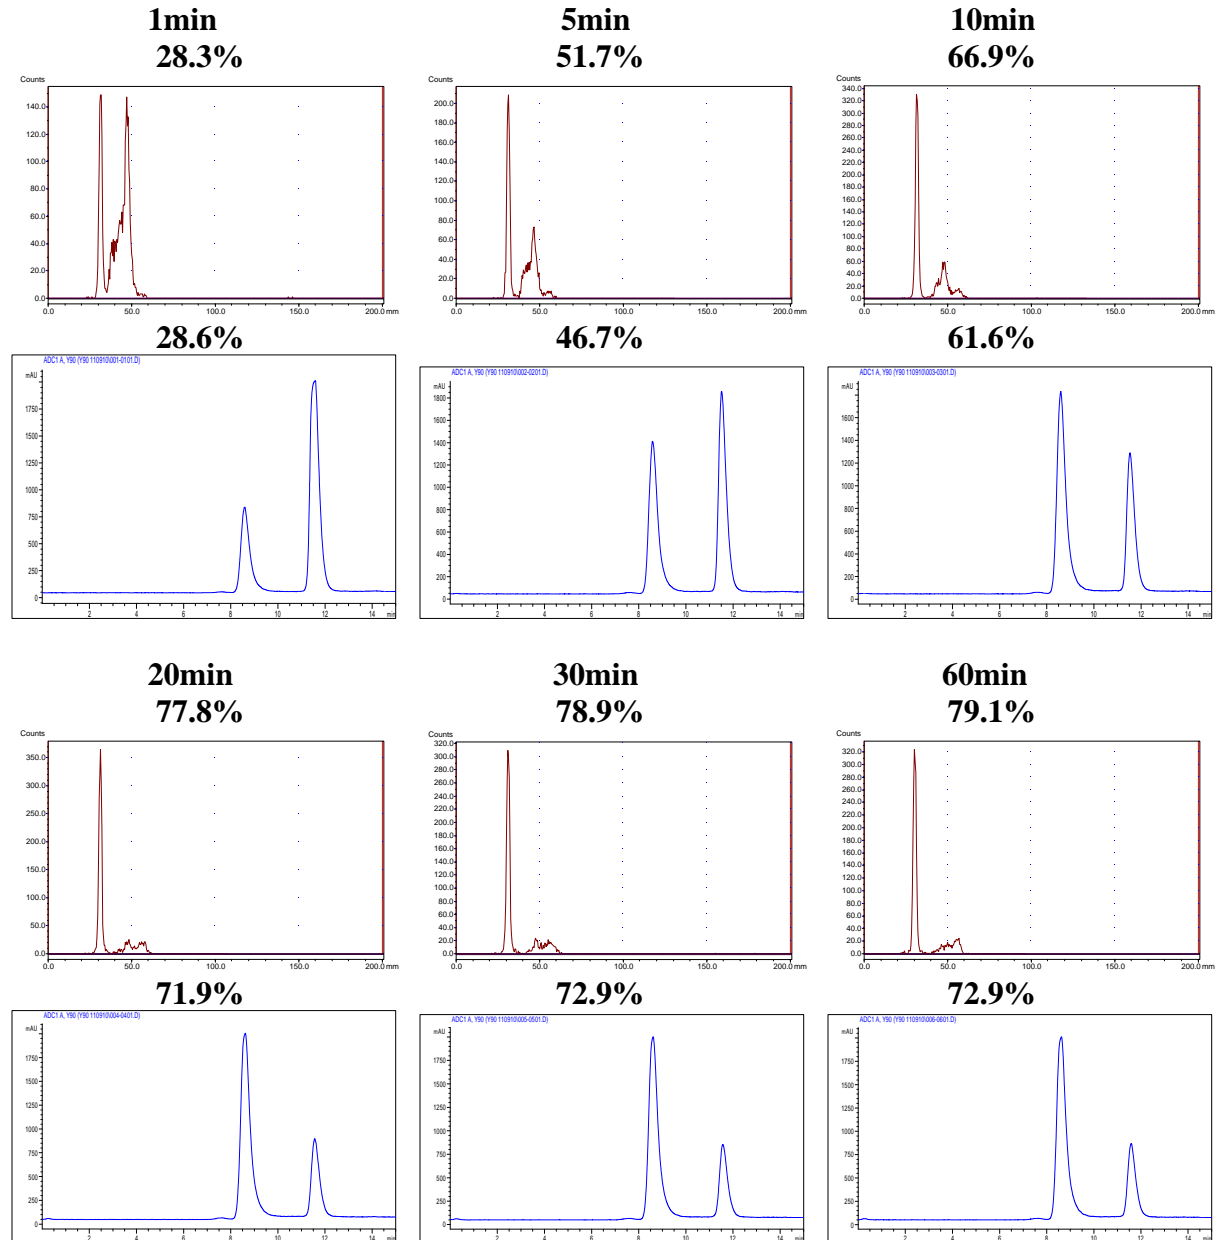

# Sample 2

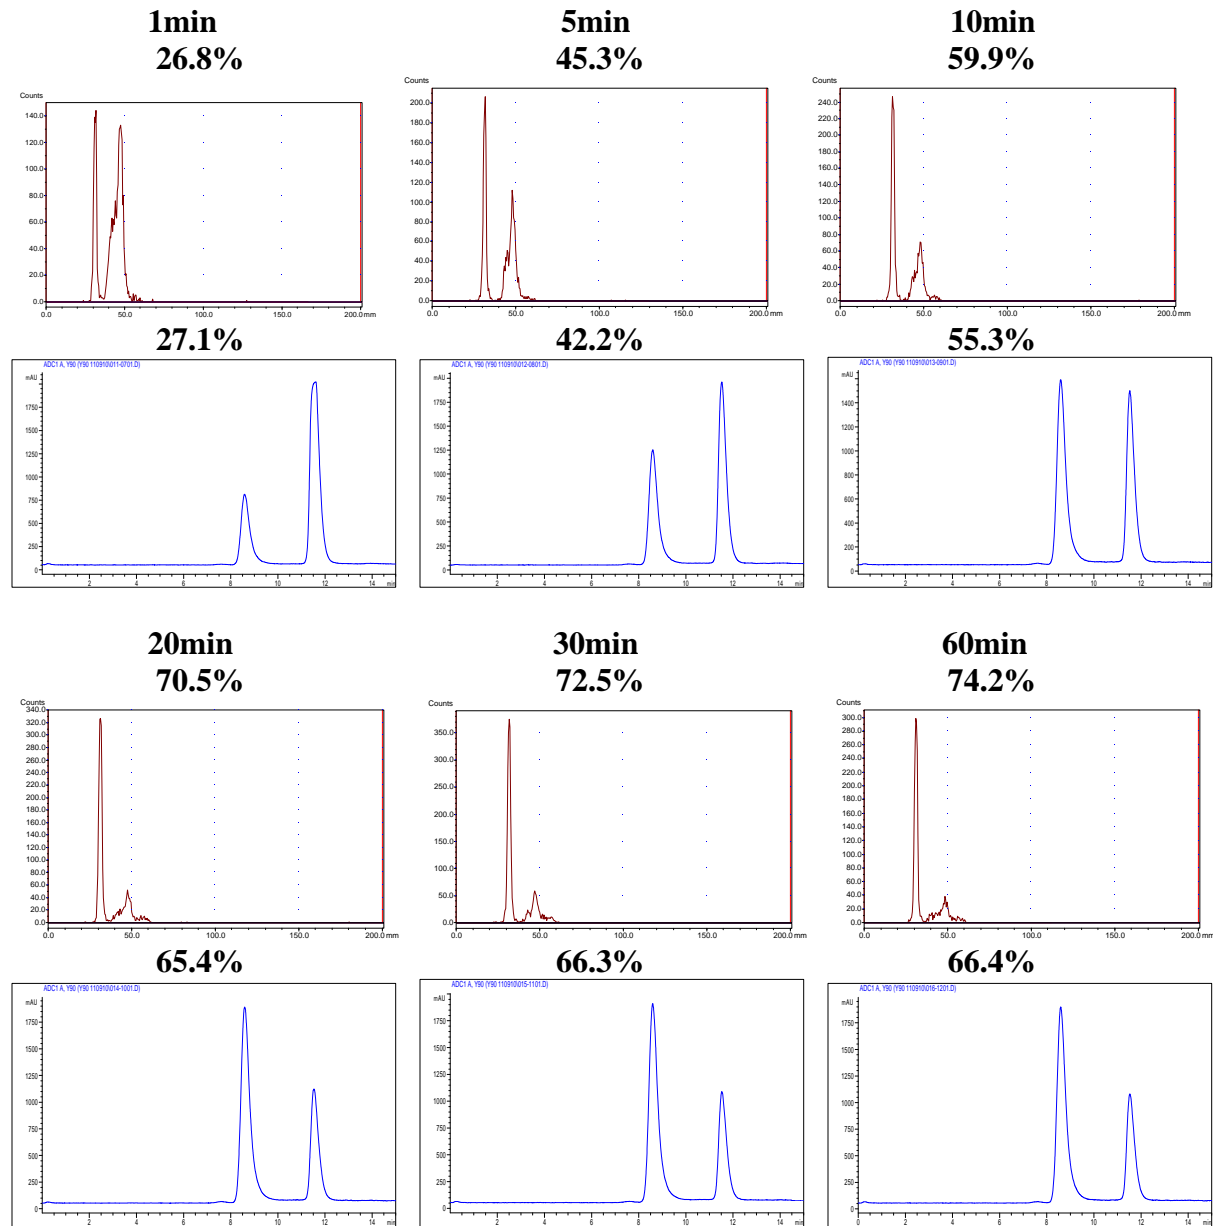

# Sample 3

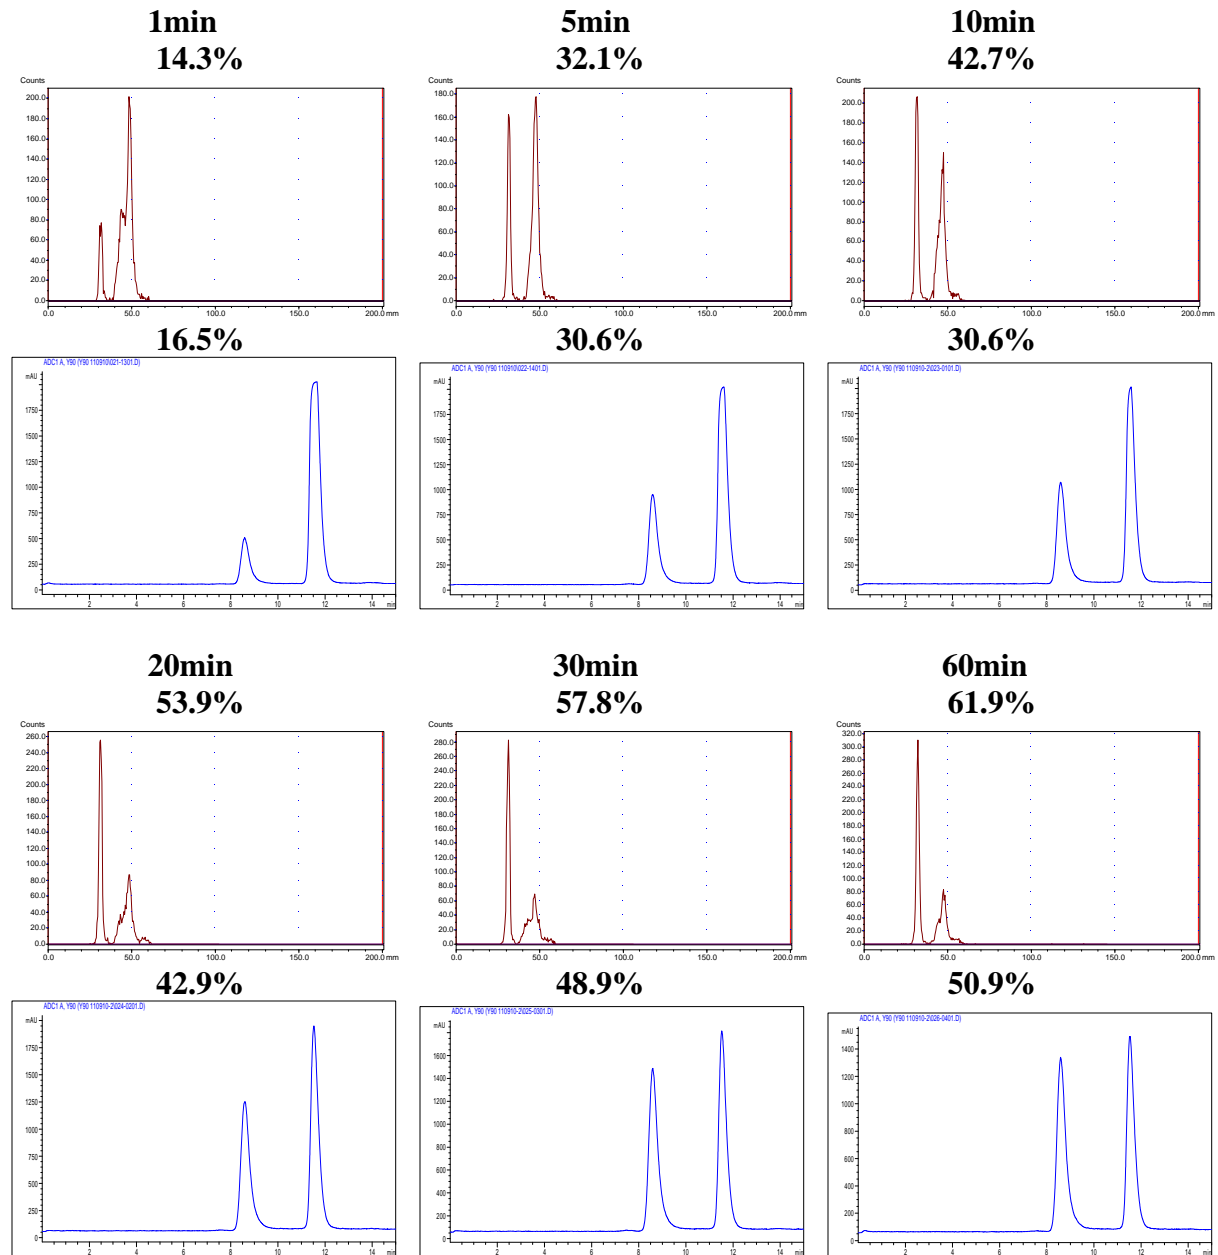

## 2. Radiolabeling of ligand-Trastuzumab conjugate with $^{177}\text{Lu}$

### i) 3p-C-NETA-trastuzumab

#### Sample 1

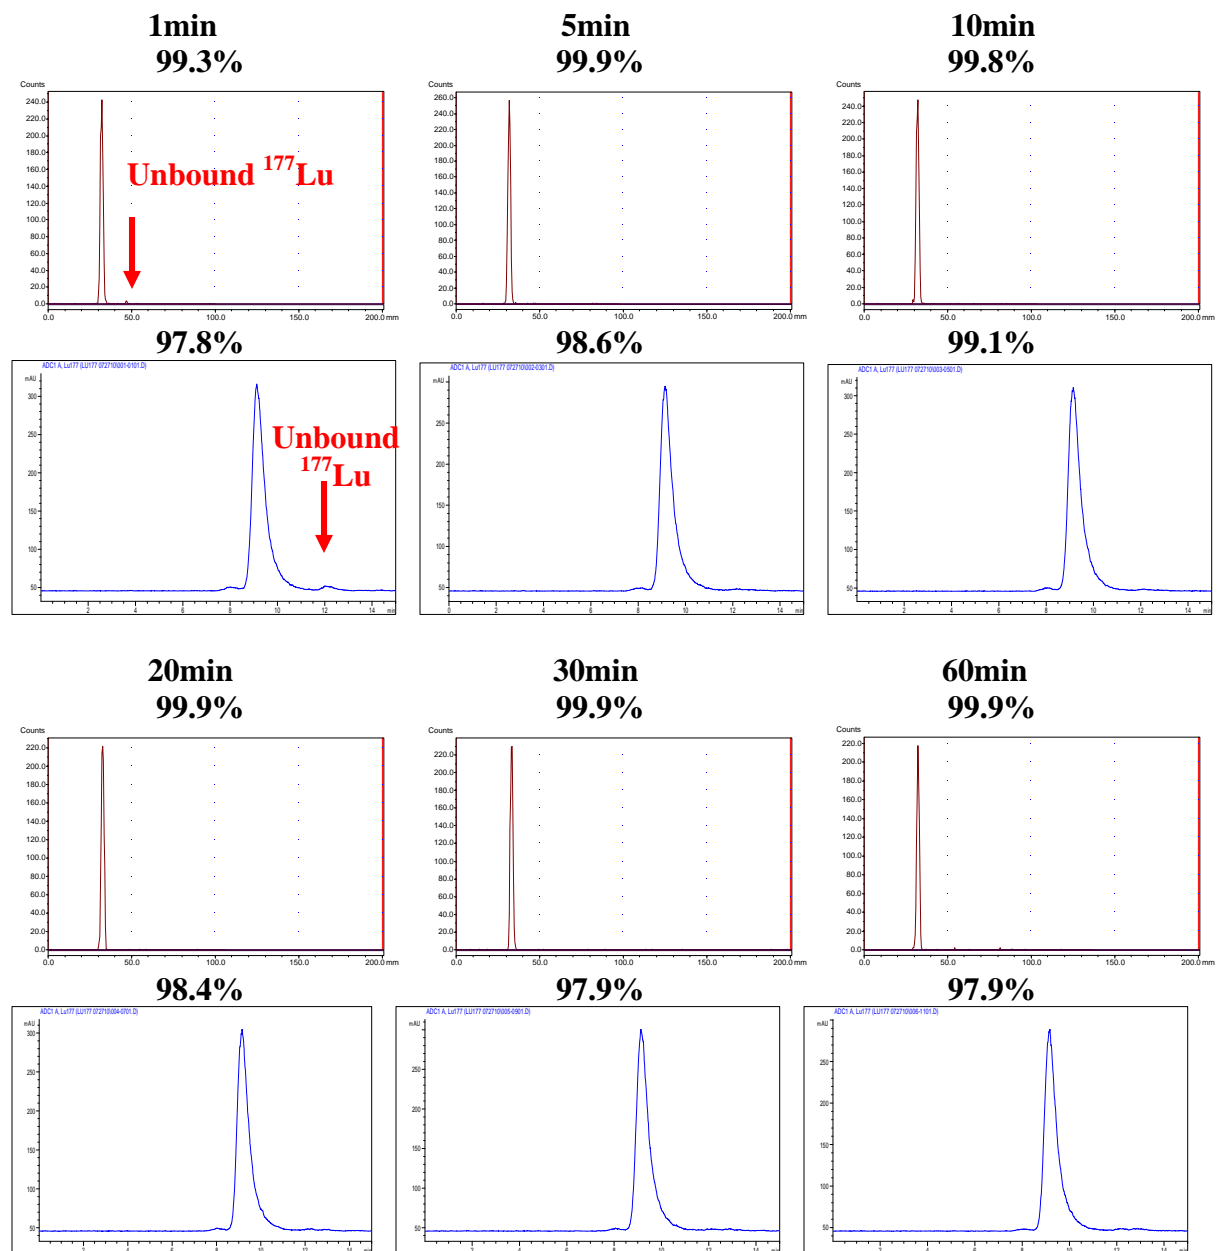

## Sample 2

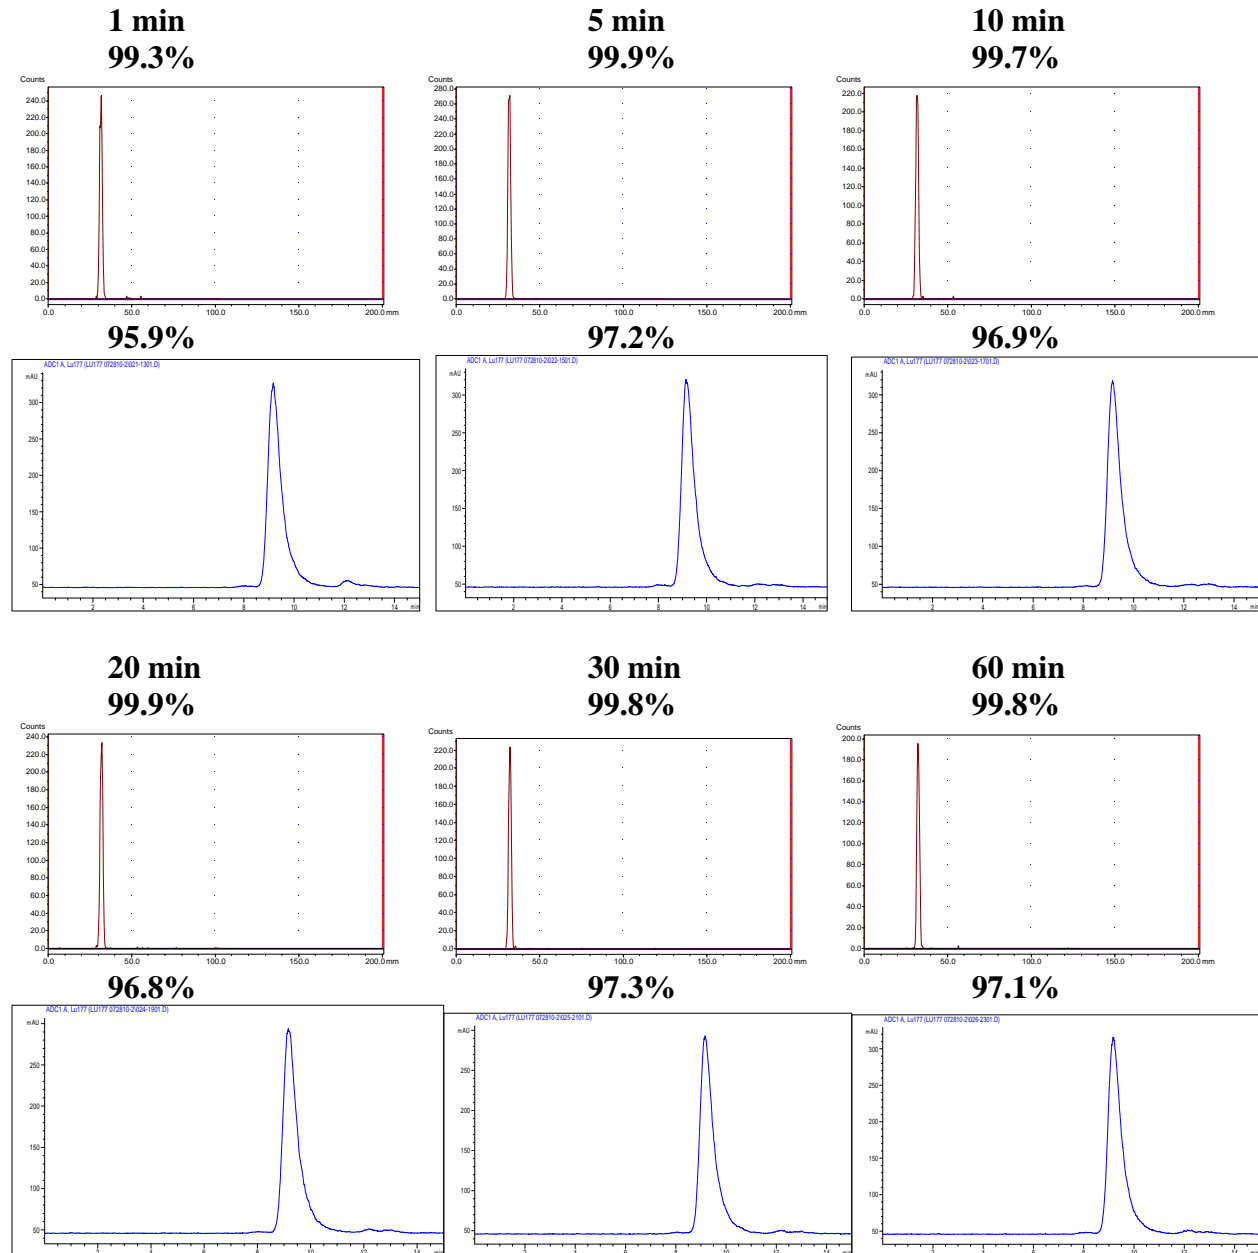

# Sample 3

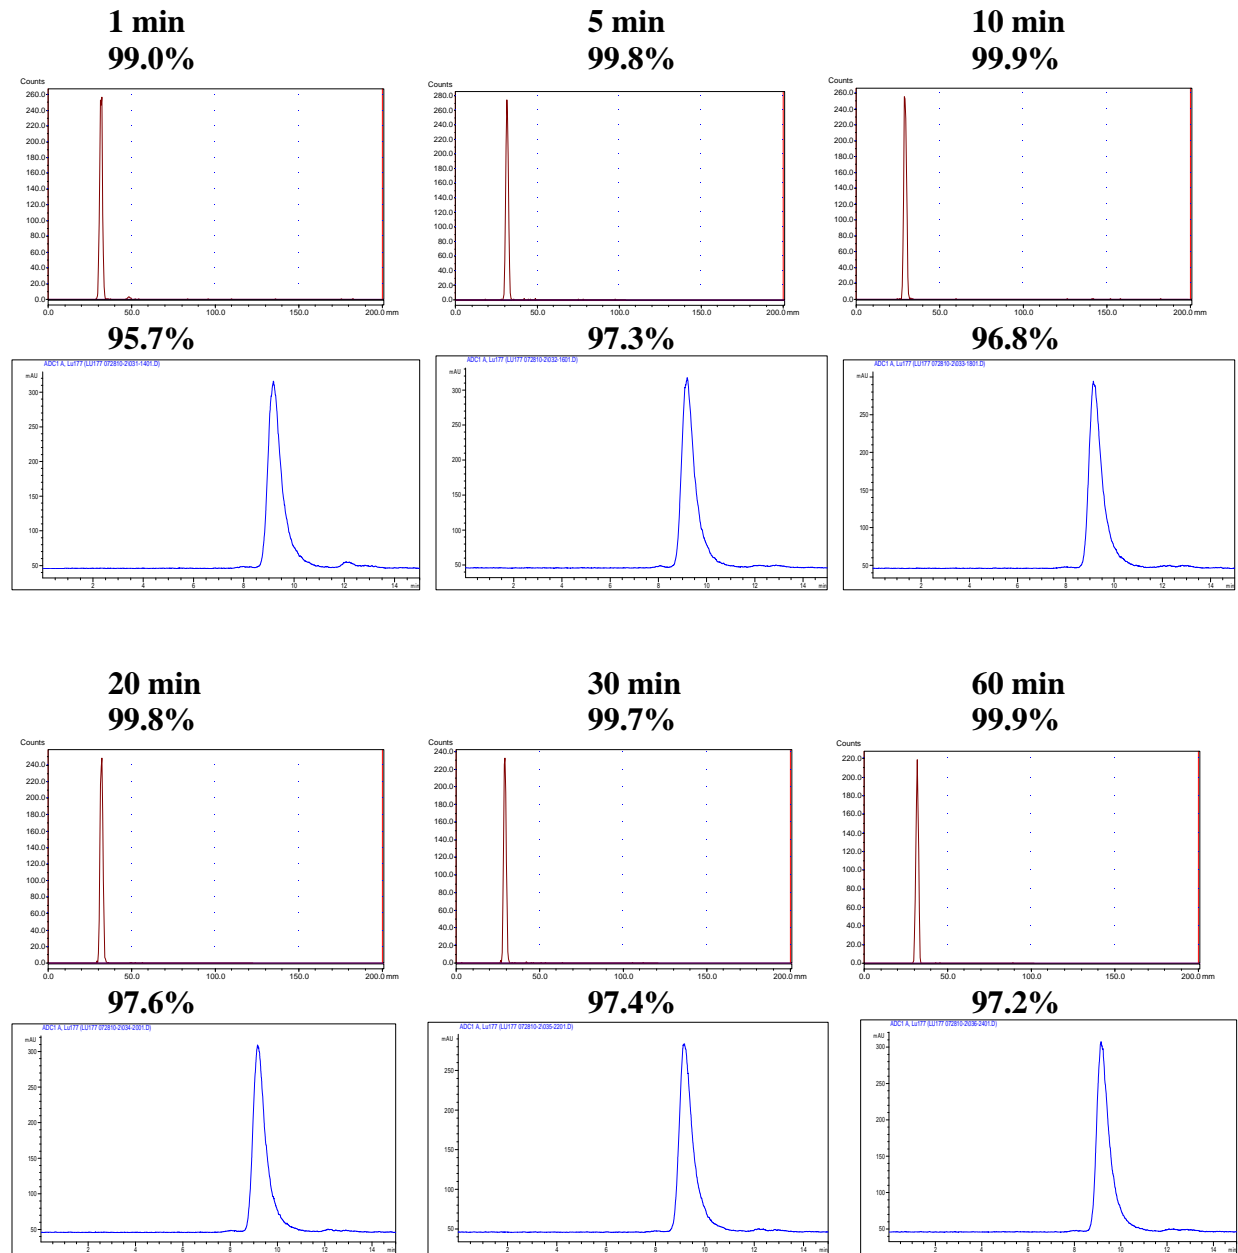



## ii) 3p-C-DEPA-Trastuzumab

### Sample 1

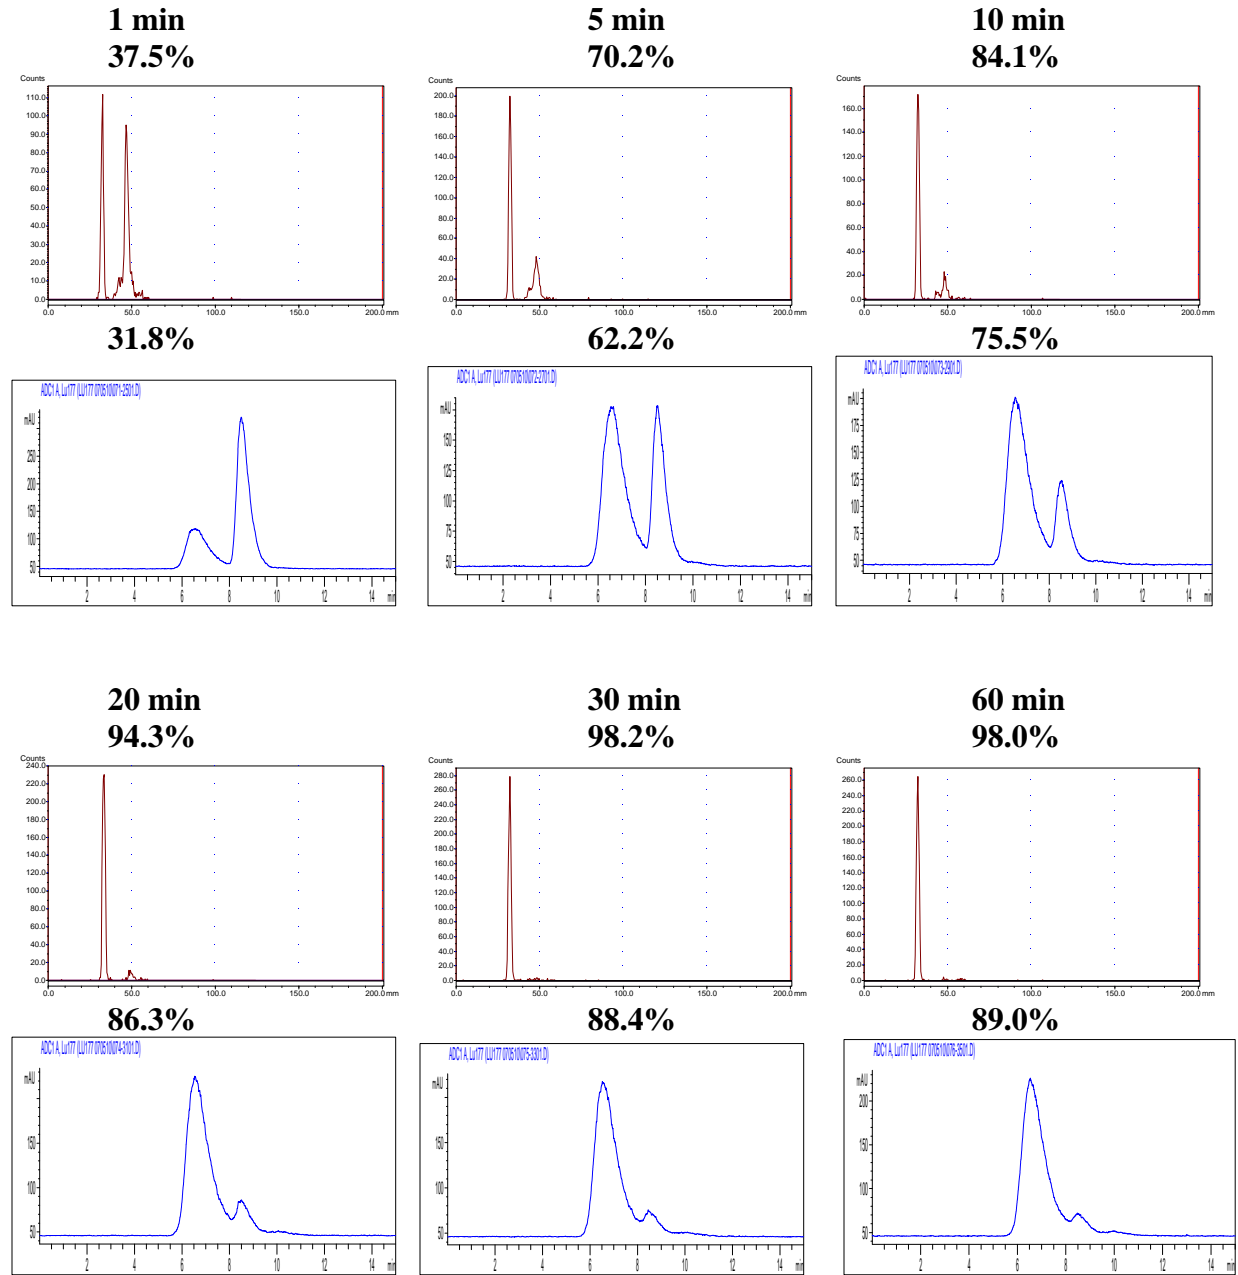

# Sample 2

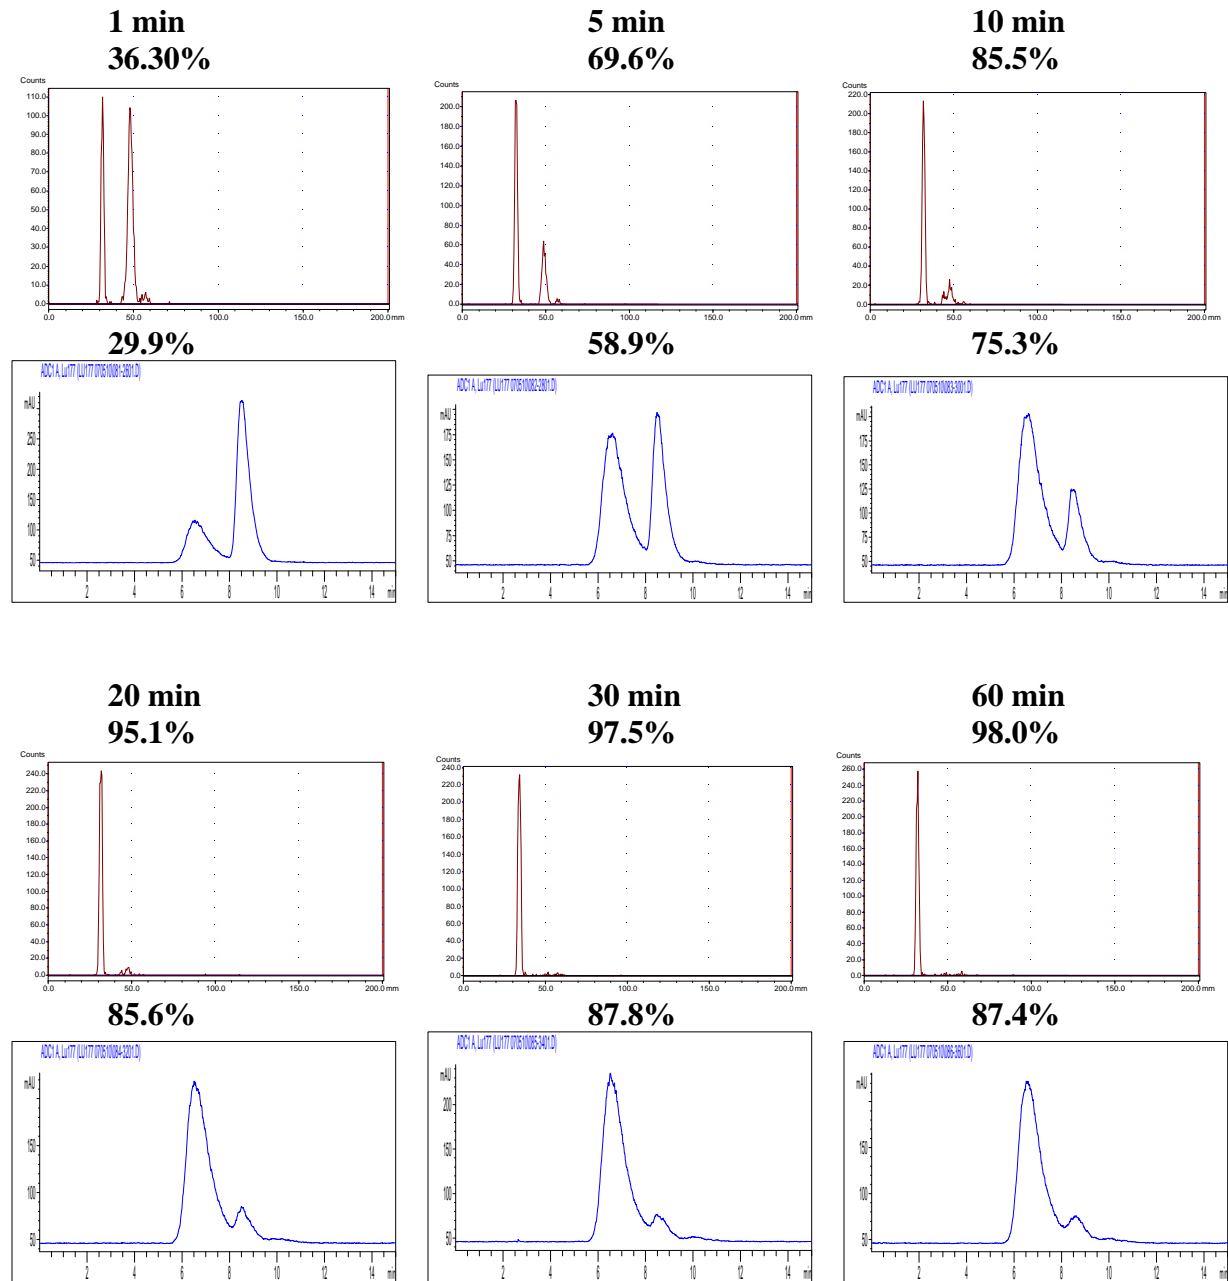

# Sample 3

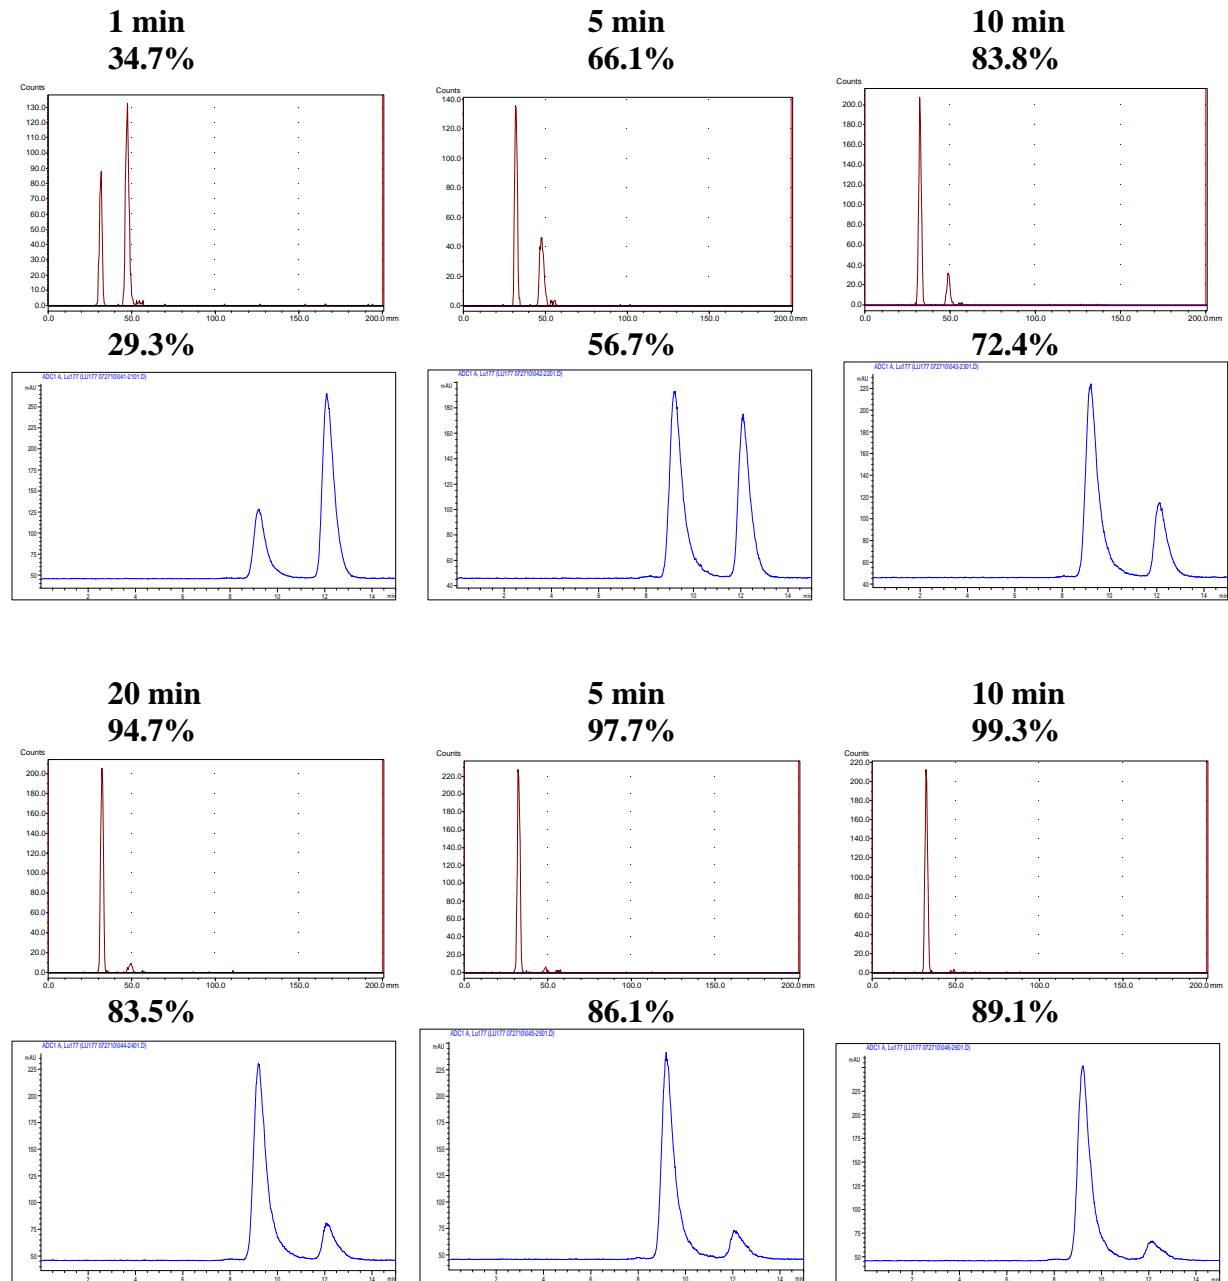

### iii) C-DTPA-Trastuzumab

#### Sample 1

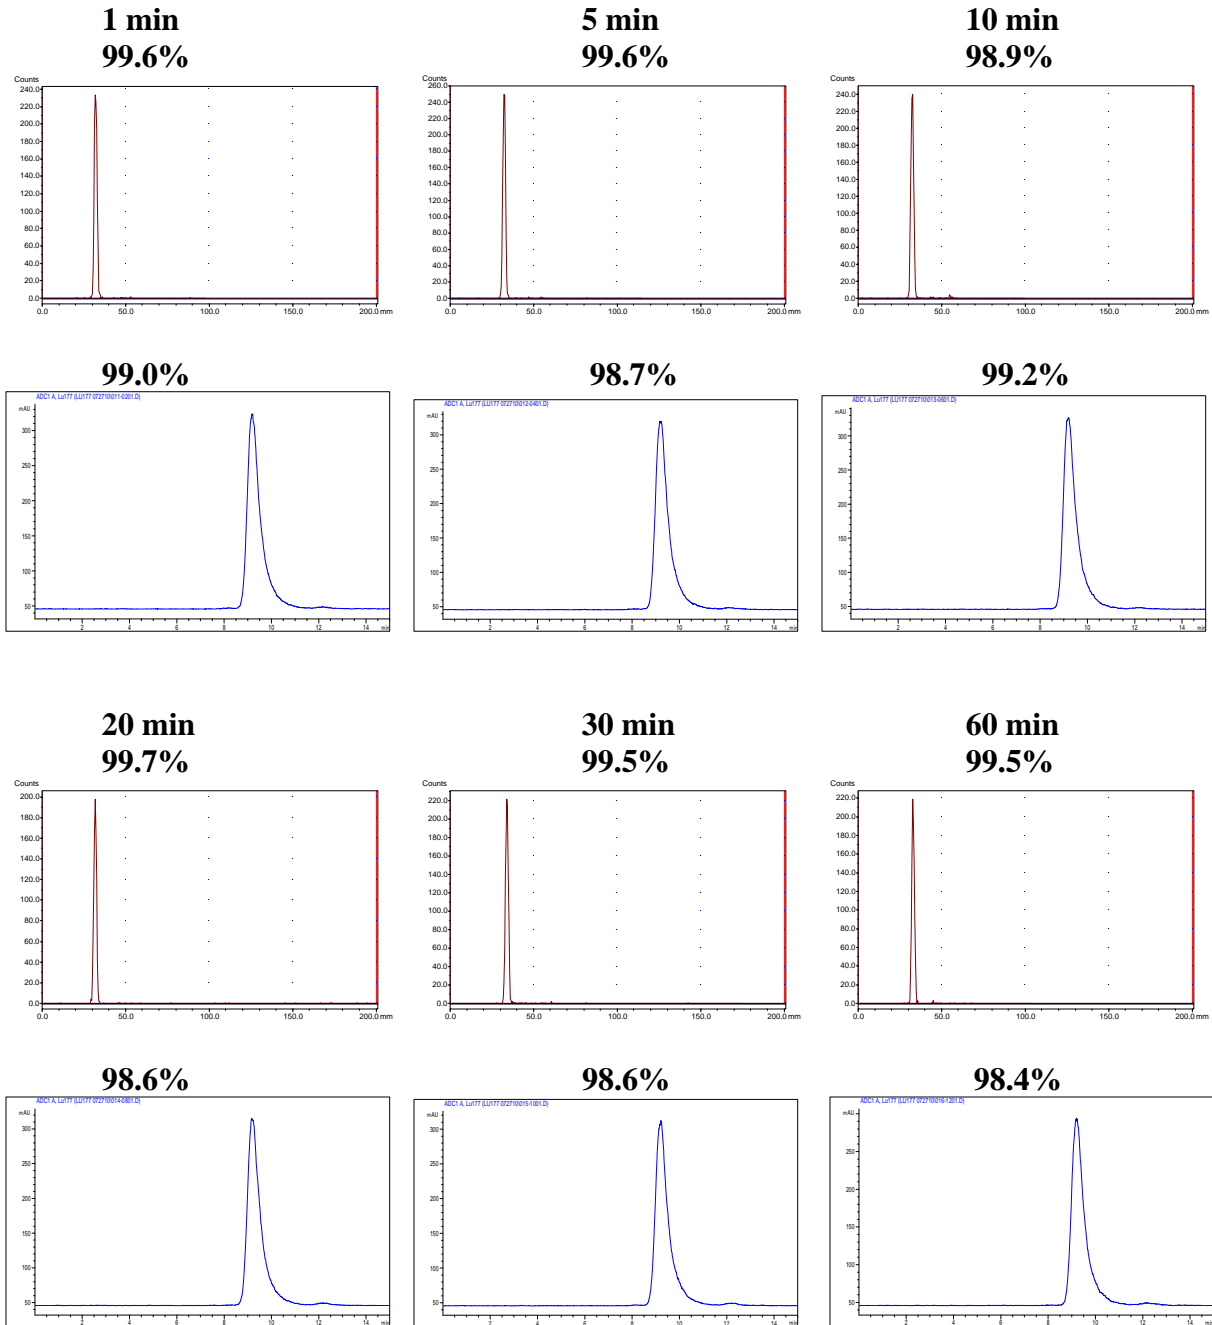

# Sample 2

**1 min**  
**99.7%**

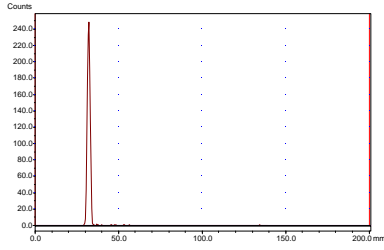

**5 min**  
**99.3%**

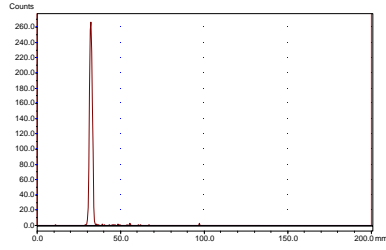

**10 min**  
**99.6%**

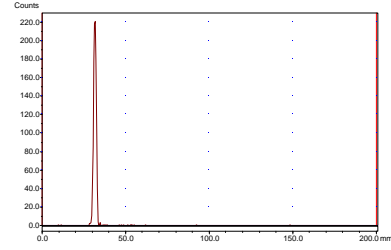

**97.9%**

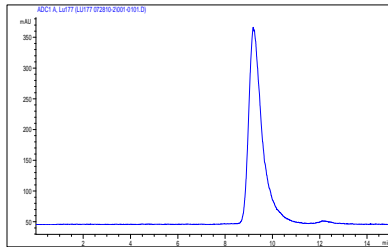

**98.2%**

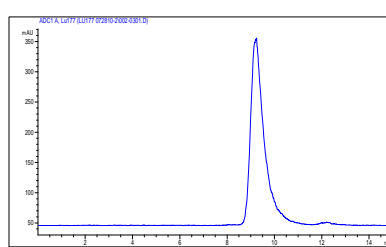

**98.0%**

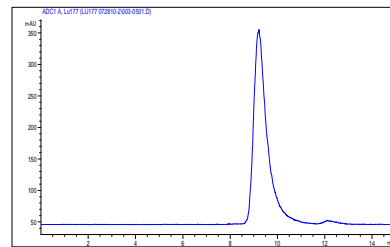

**20 min**  
**99.7%**

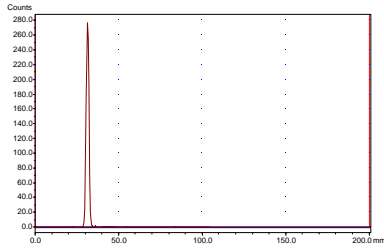

**30 min**  
**99.8%**

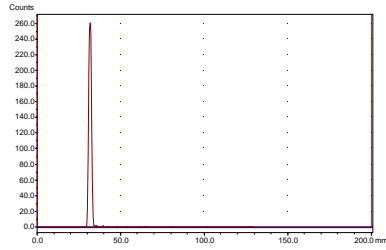

**60 min**  
**99.1%**

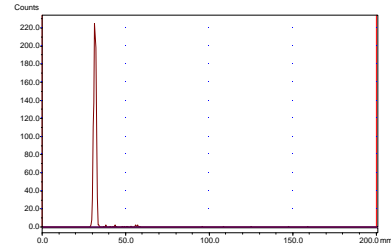

**98.1%**

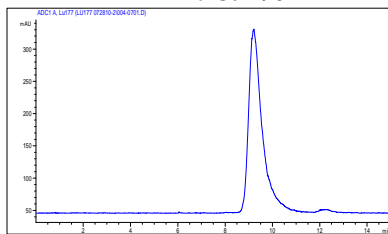

**98.1%**

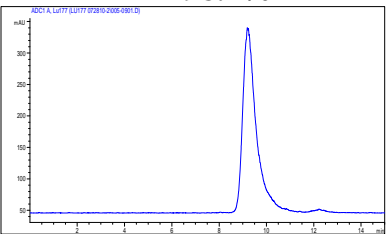

**98.1%**

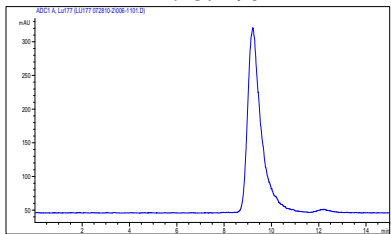

# Sample 3

**1 min**  
**99.1%**

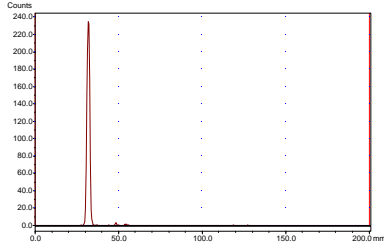

**5 min**  
**99.4%**

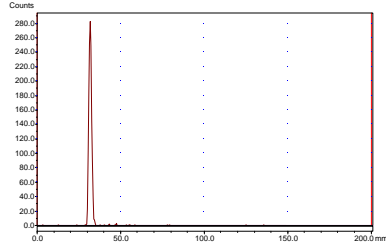

**10 min**  
**99.7%**

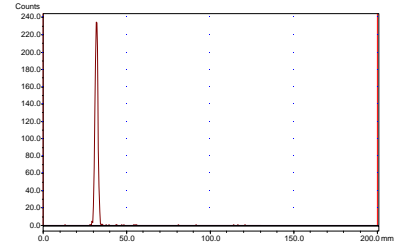

**98.1%**

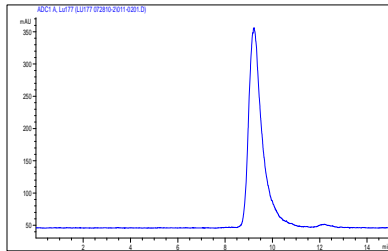

**98.1%**

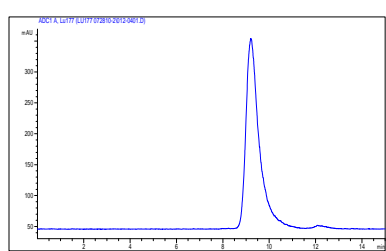

**98.0%**

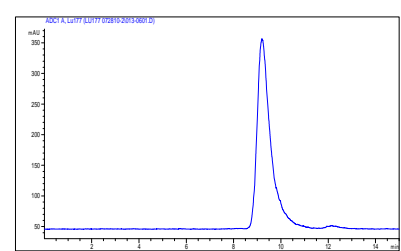

**20 min**  
**99.4%**

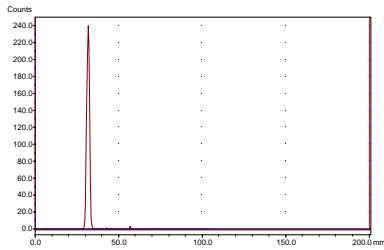

**30 min**  
**99.4%**

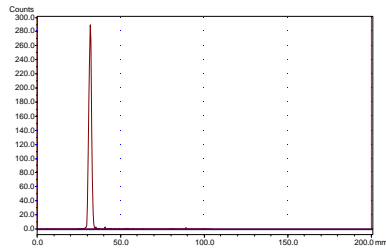

**60 min**  
**99.7%**

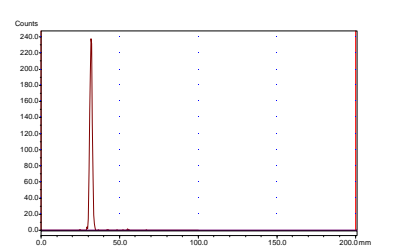

**98.1%**

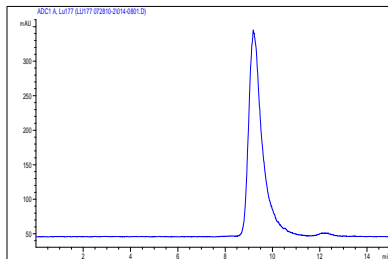

**98.2%**

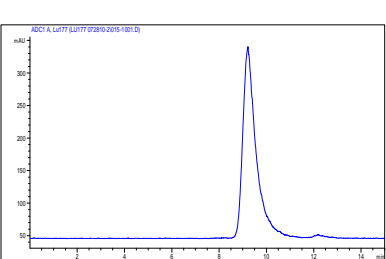

**97.9%**

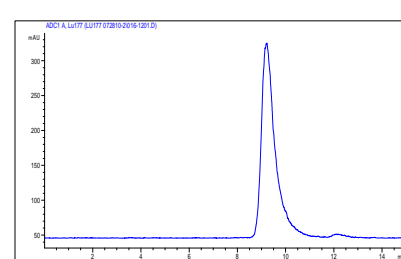

iv) C-DOTA-trastuzumab

**Sample 1**

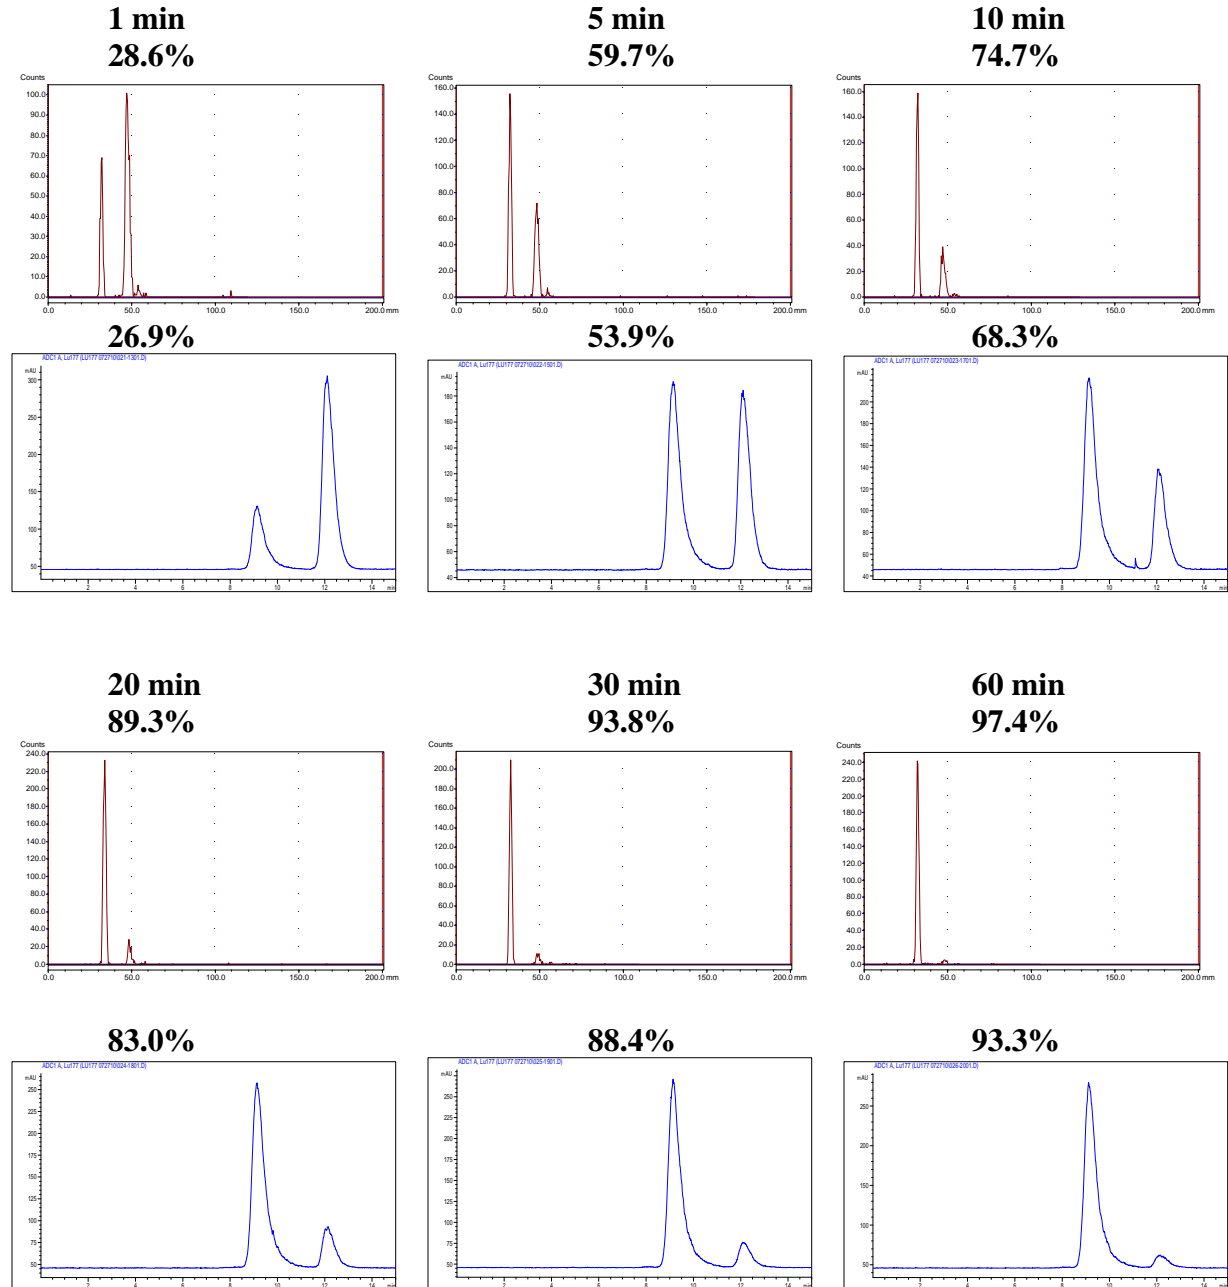

**Sample 2**

**1 min**  
**29.2%**

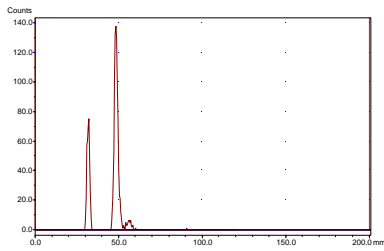

**5 min**  
**57.1%**

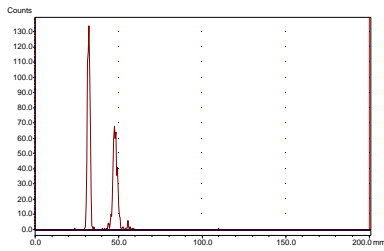

**10 min**  
**77.4%**

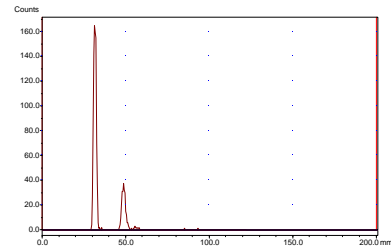

**25.8%**

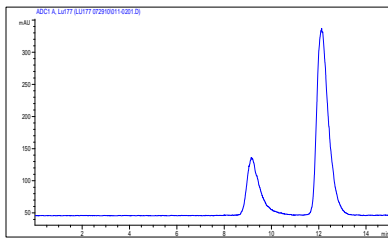

**53.6%**

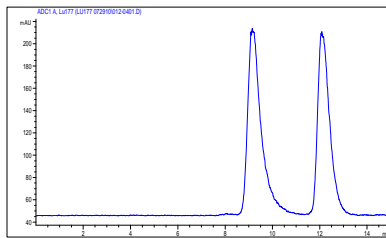

**71.3%**

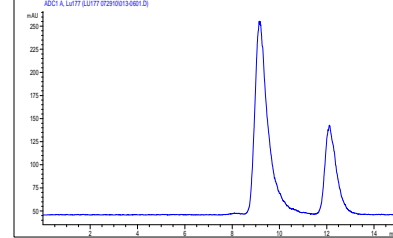

**20 min**  
**89.2%**

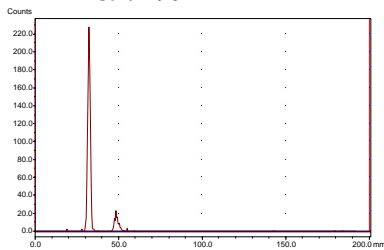

**30 min**  
**94.6%**

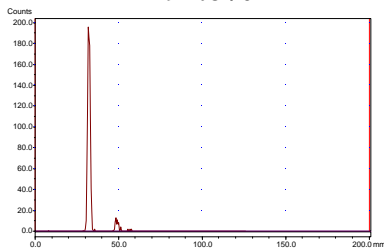

**60 min**  
**97.9%**

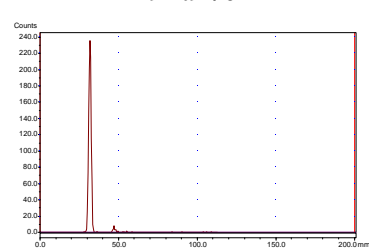

**85.7%**

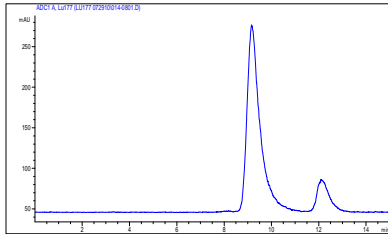

**91.4%**

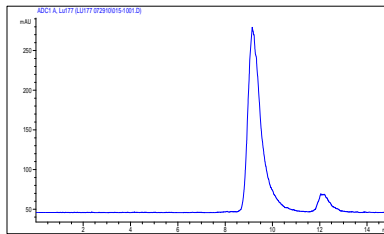

**95.8%**

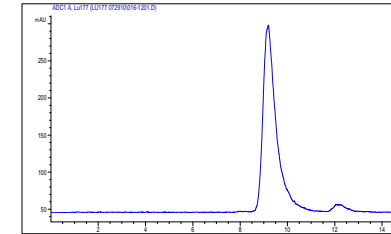

**Sample 3**



**1 min  
31.4%**

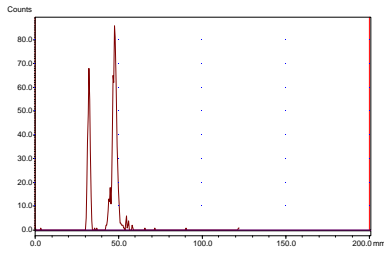

**5 min  
58.9%**

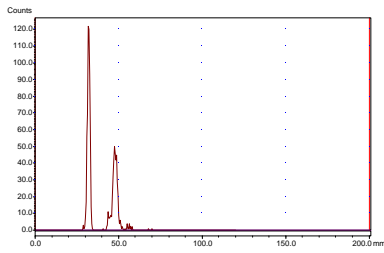

**10 min  
74.4%**

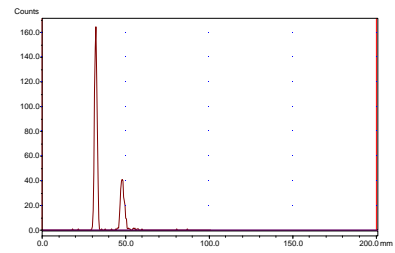

**31.5%**

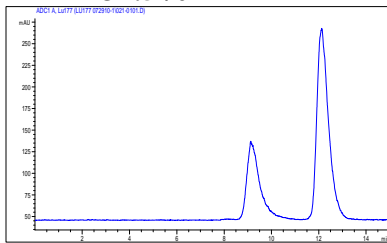

**56.3%**

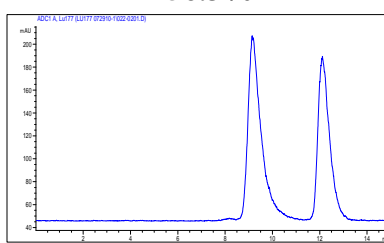

**70.8%**

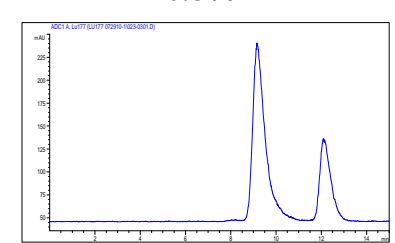

**20 min  
89.3%**

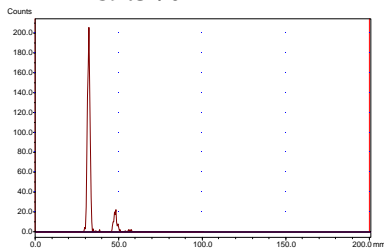

**30 min  
94.1%**

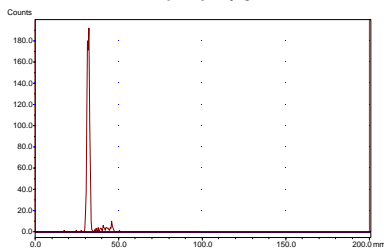

**60 min  
98.0%**

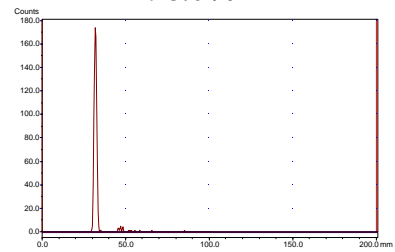

**85.2%**

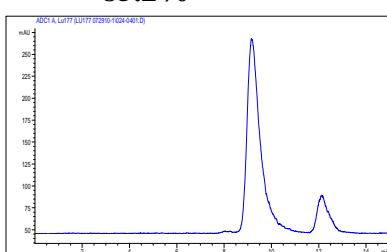

**90.5%**

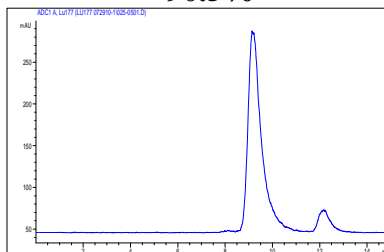

**95.4%**

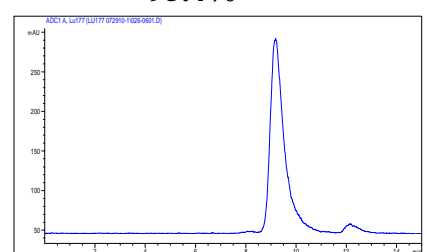

## B. HPLC chromatograms for serum stability measurements

### 1. $^{90}\text{Y}$ -radiolabelled ligand-trastuzumab conjugates

#### i) $^{90}\text{Y}$ -3p-C-NETA-Trastuzumab

0 hr

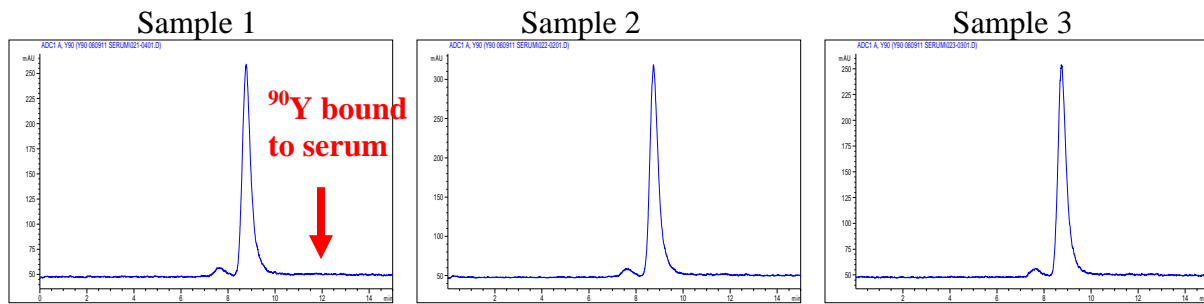

22 hr

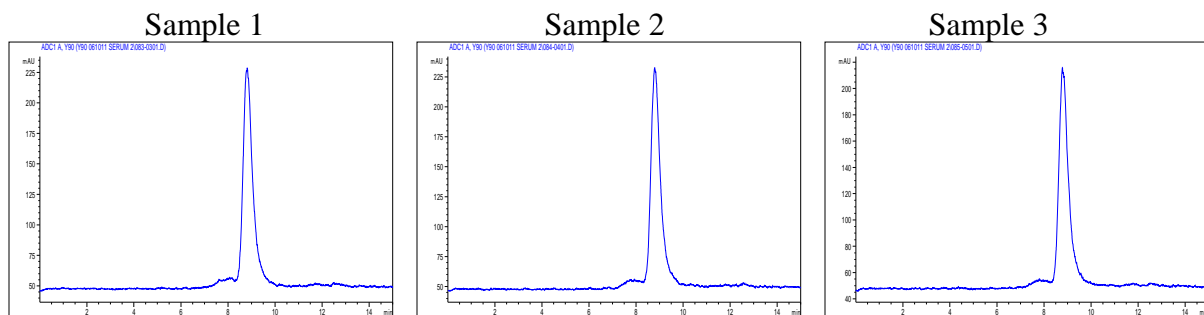

51 hr

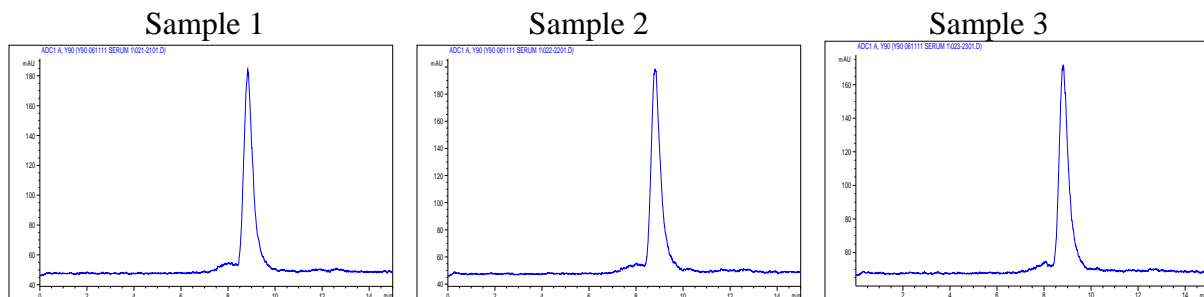

**89 hr**

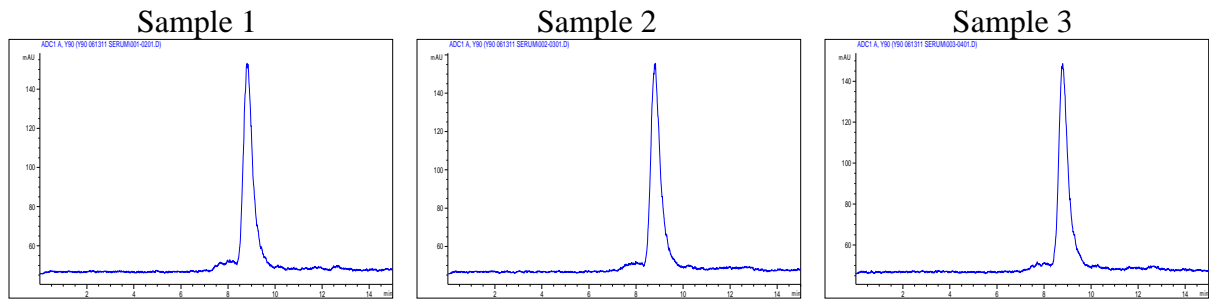

**115 hr**

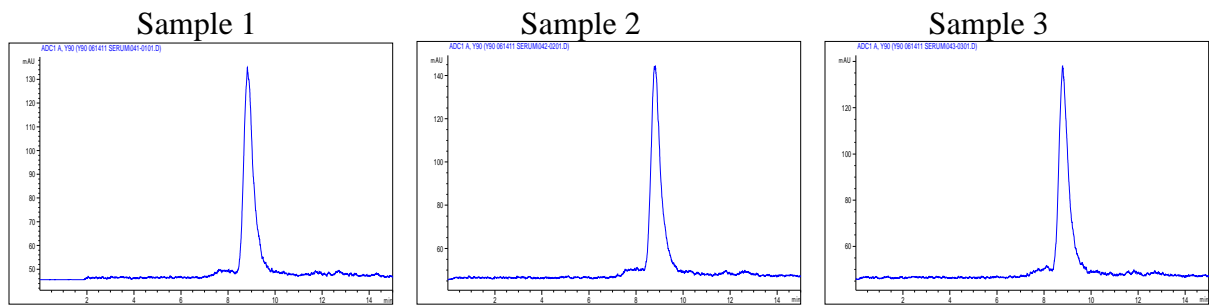

**134 hr**

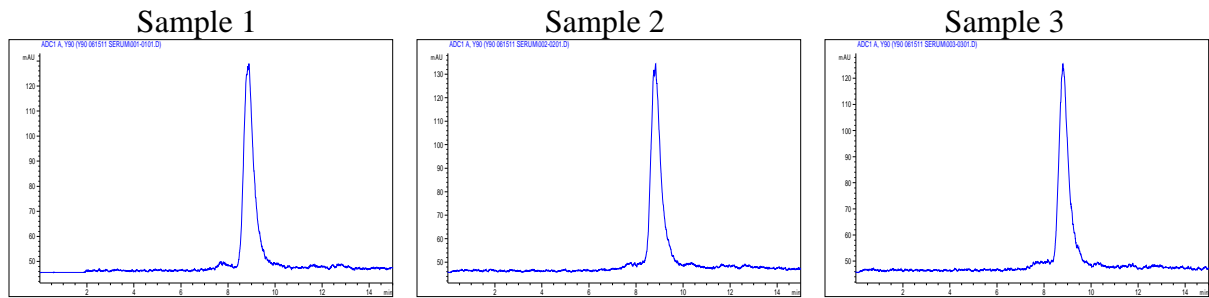

**160 hr**

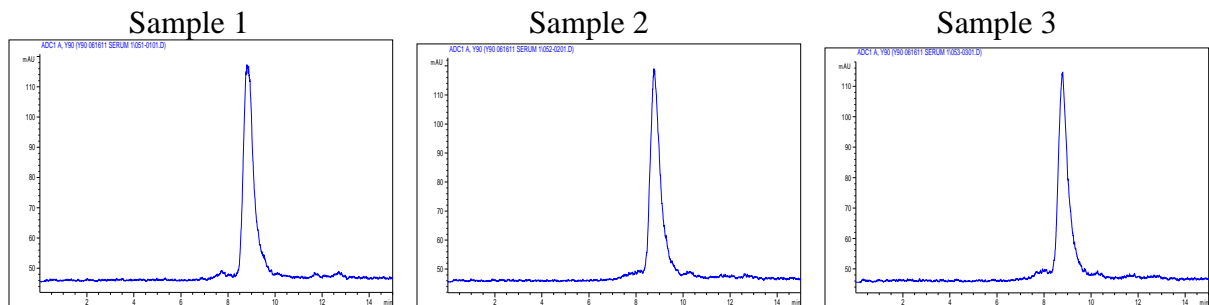

**182 hr**

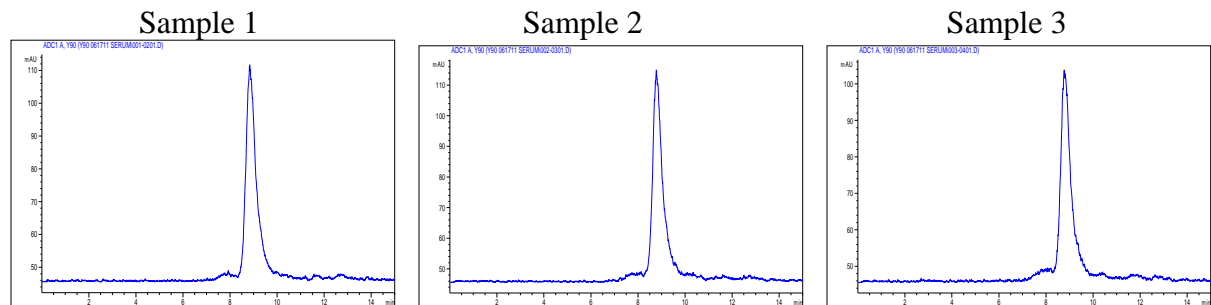

**208 hr**

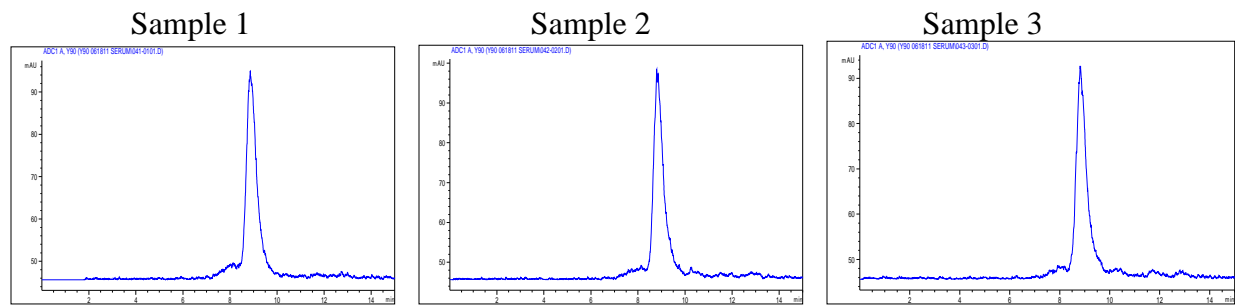

**234 hr**

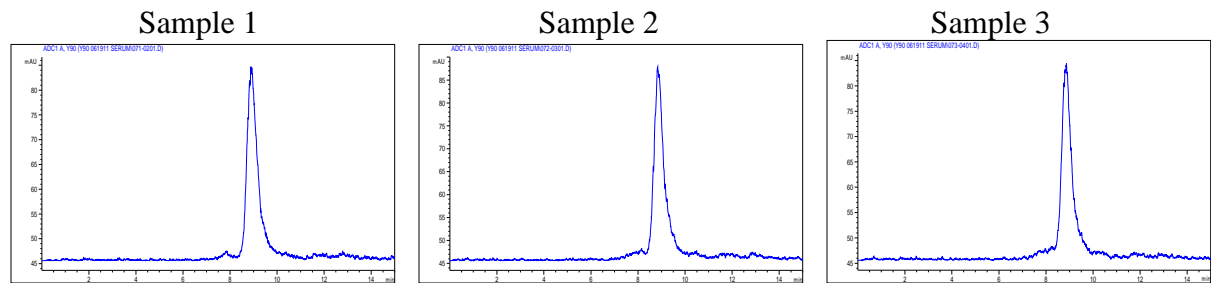

**253 hr**

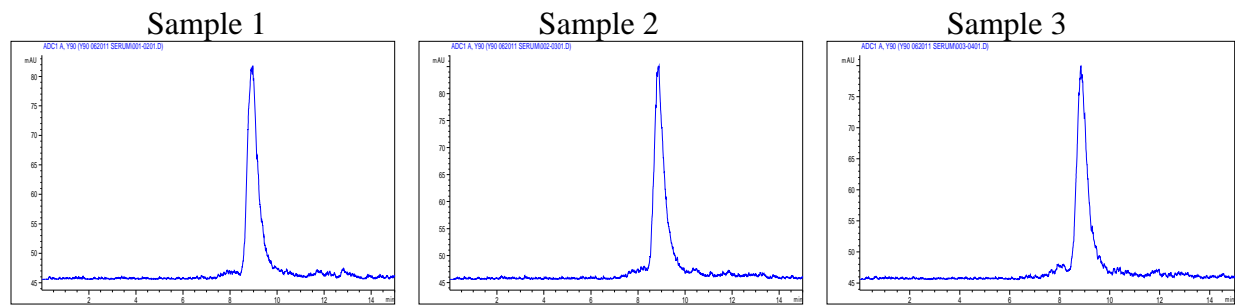

**277 hr**

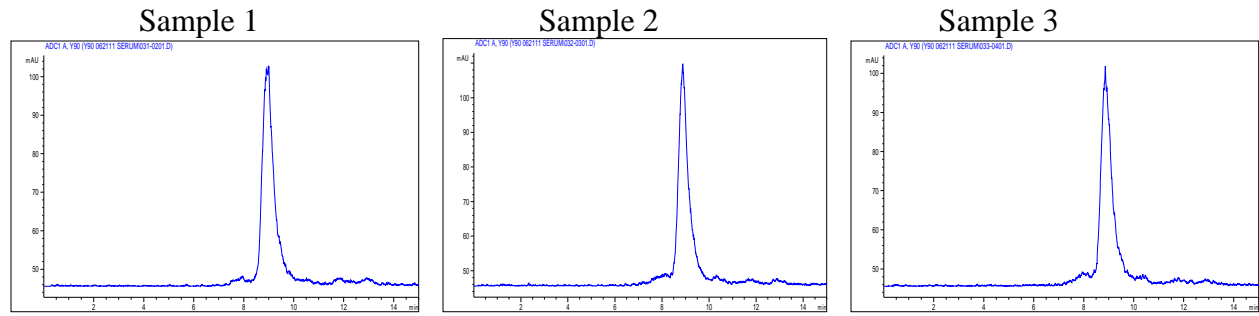

**302 hr**

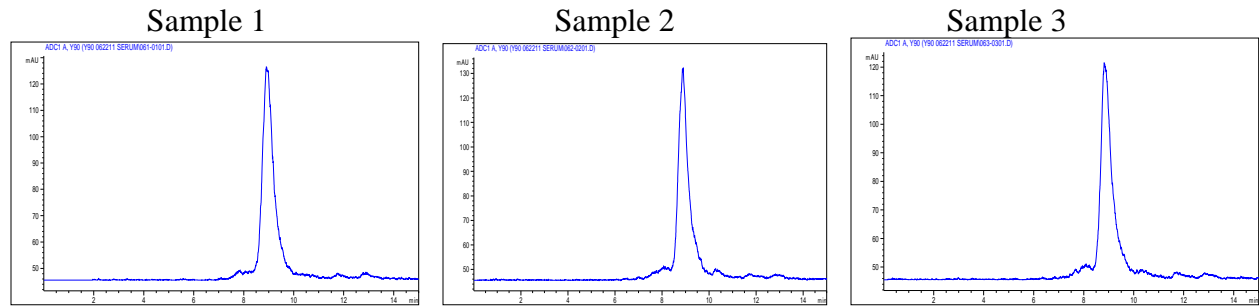

**327 hr**

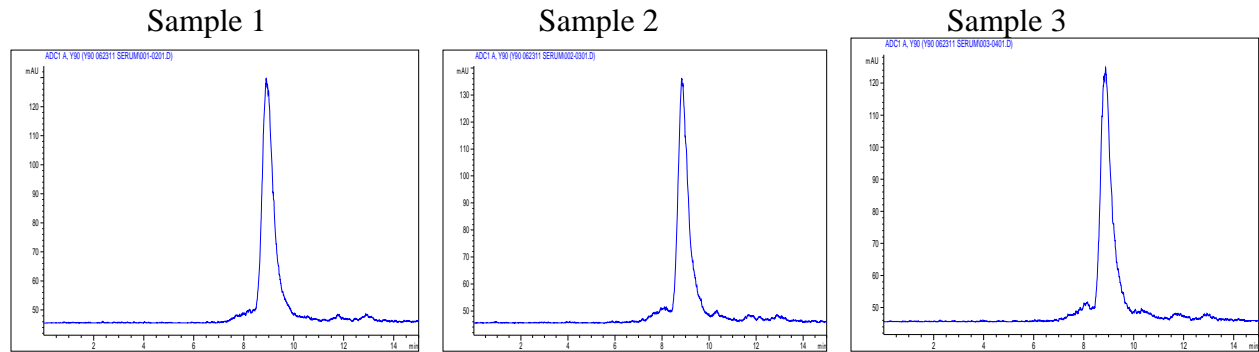

**349 hr**

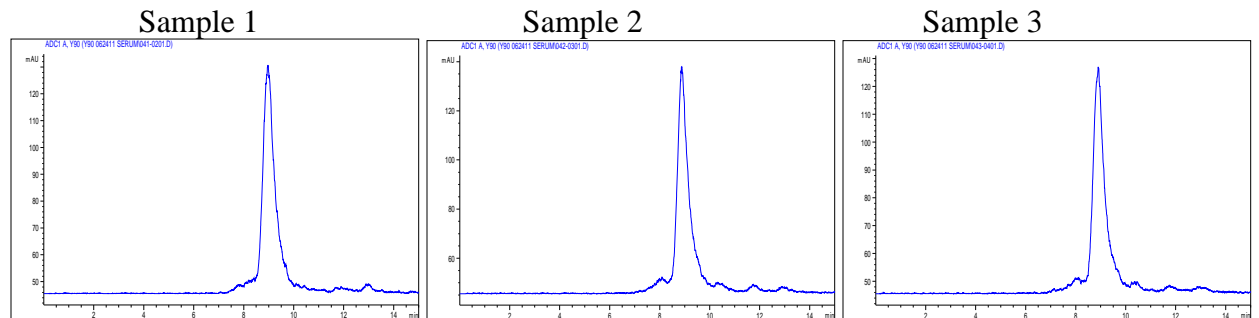

ii)  $^{90}\text{Y}$ -3p-C-DEPA-Trastuzumab

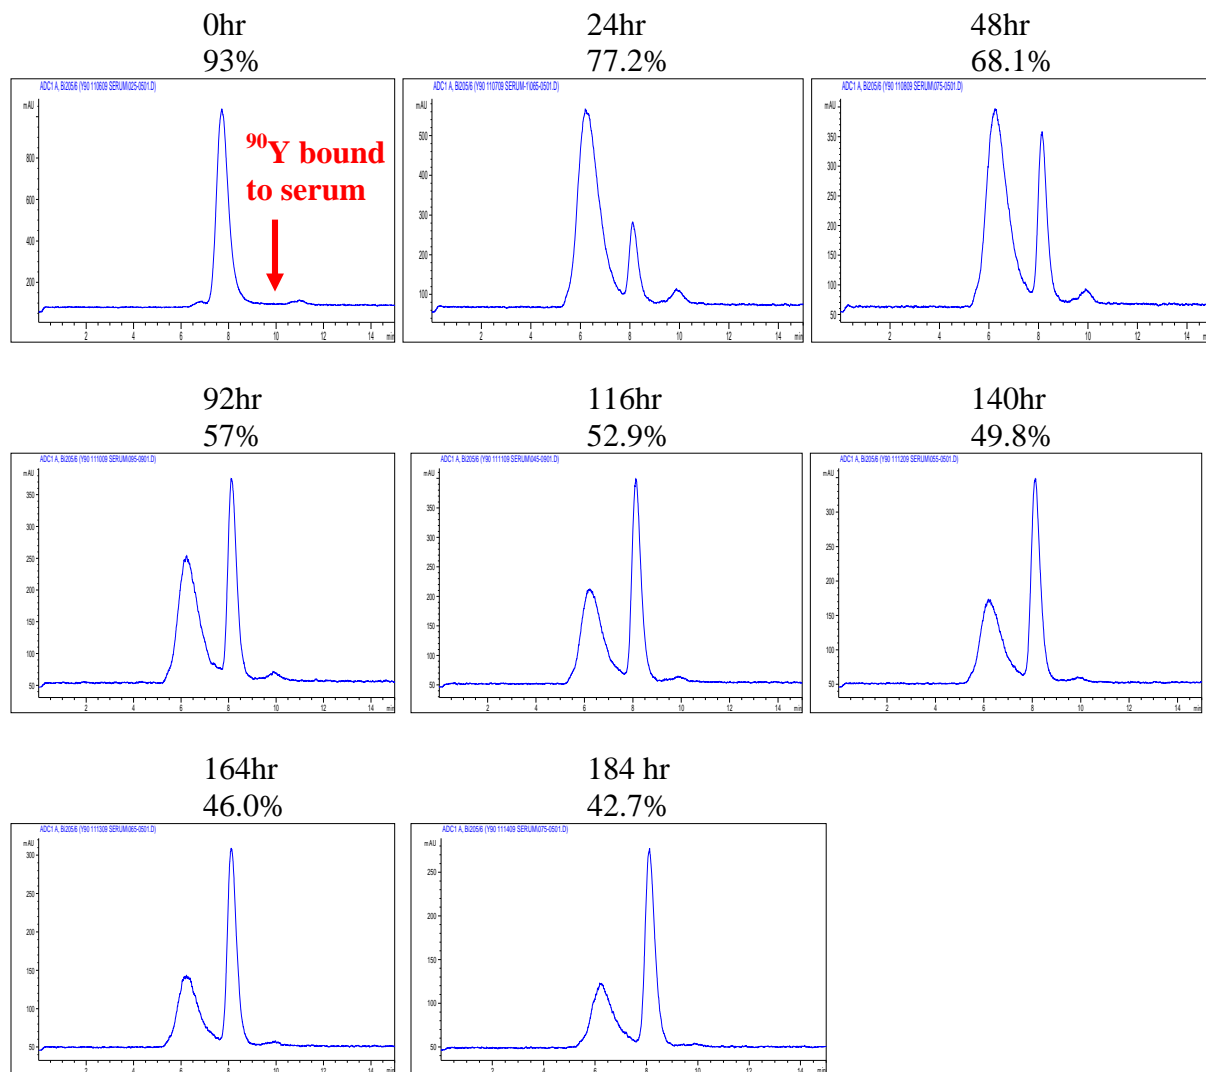

iii)  $^{90}\text{Y}$ -C-DOTA-Trastuzumab

0 hr

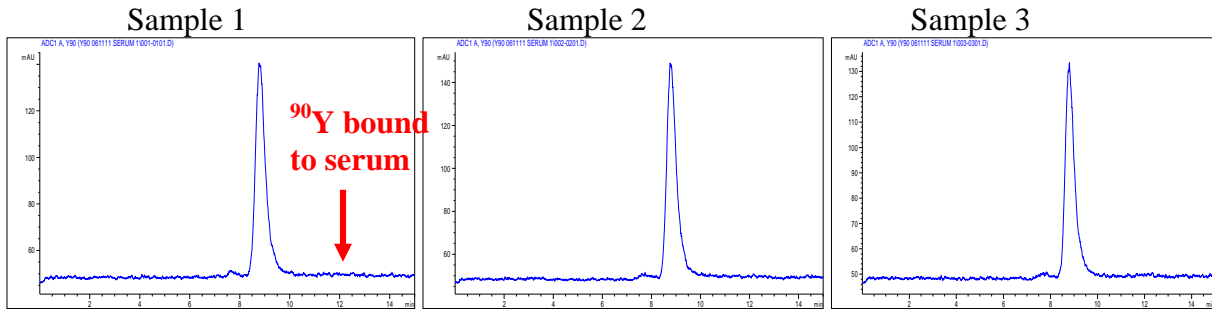

27 hr

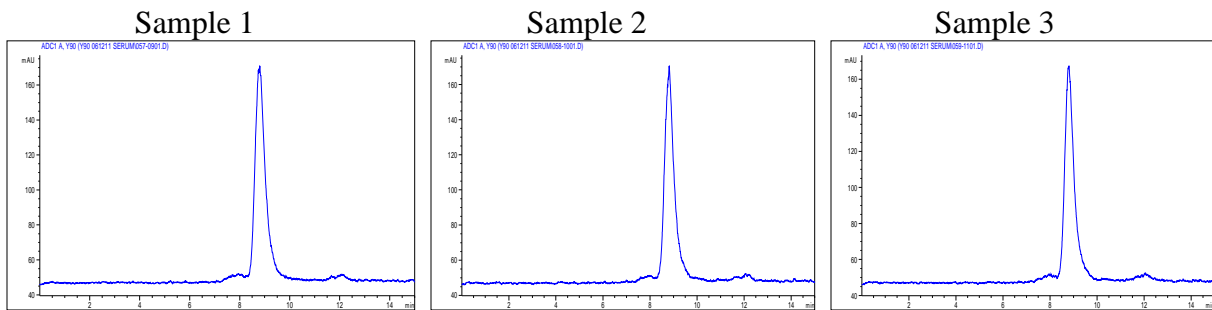

47 hr

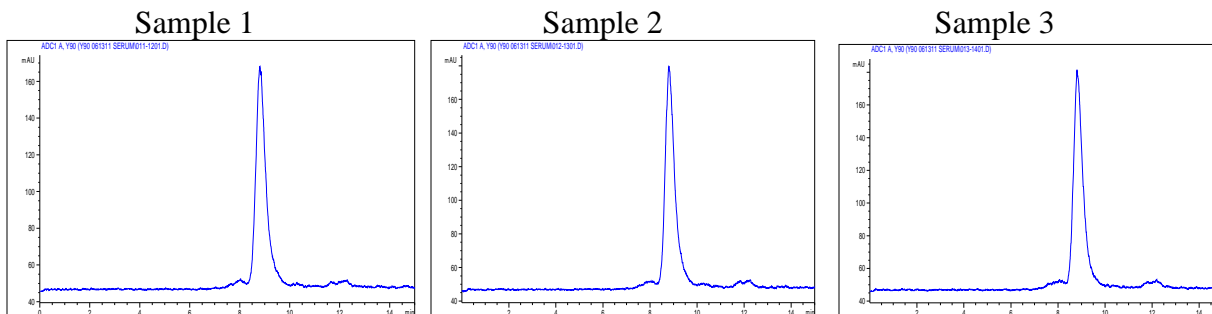

72 hr

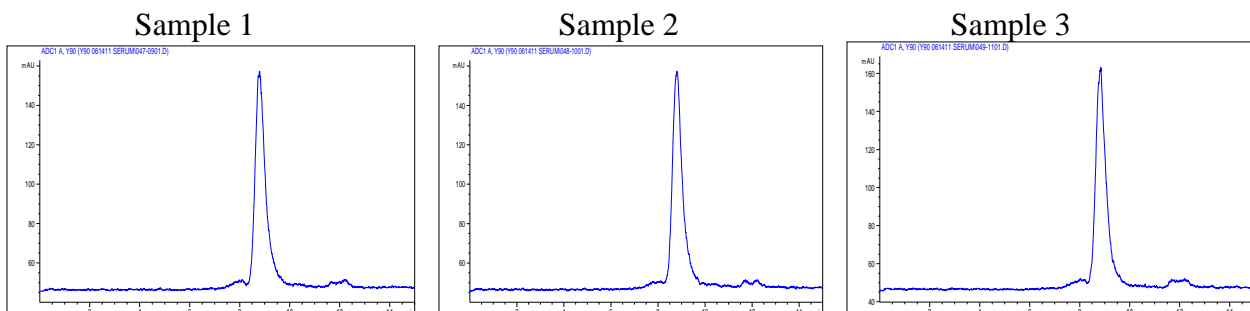

**91 hr**

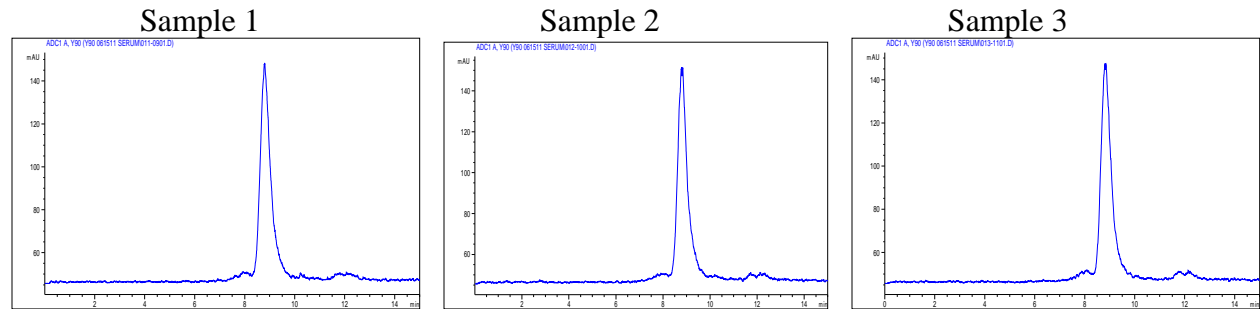

**118 hr**

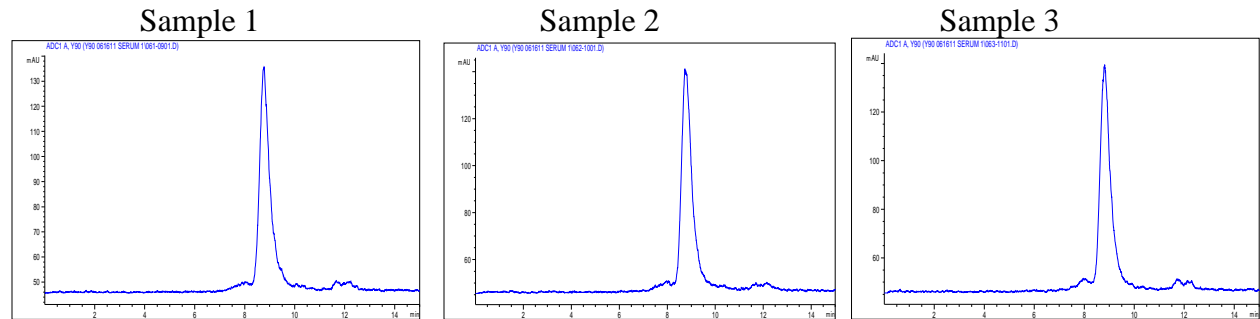

**140 hr**

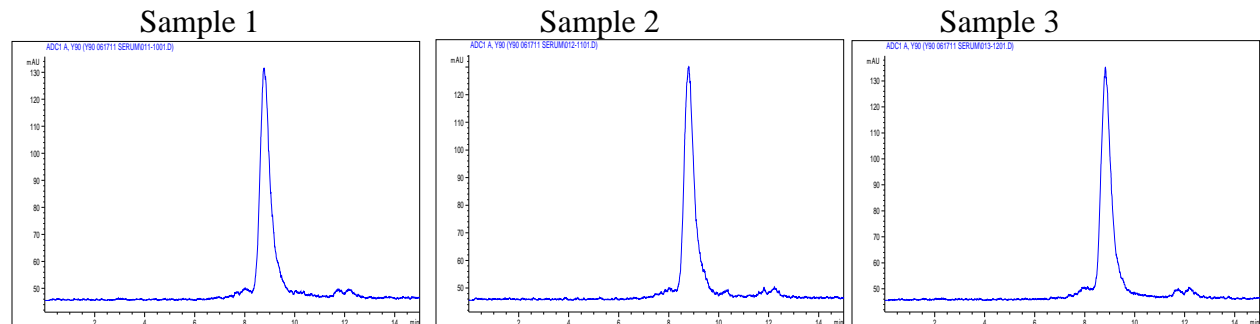

**165 hr**

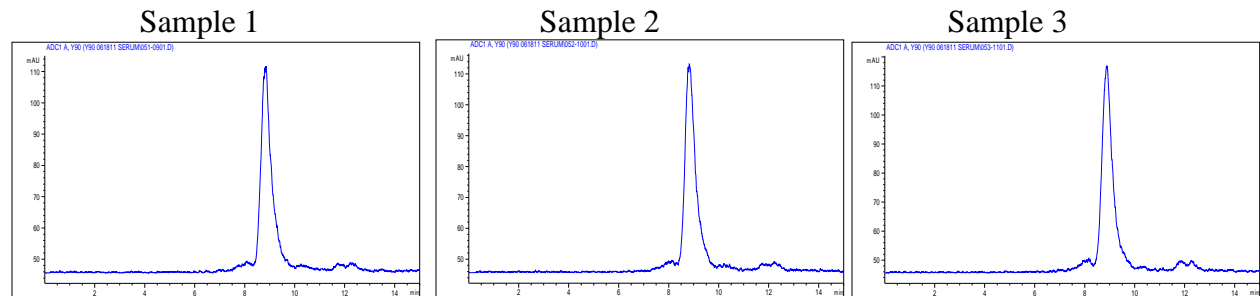



**191 hr**

Sample 1

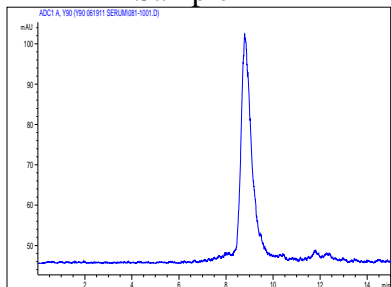

Sample 2

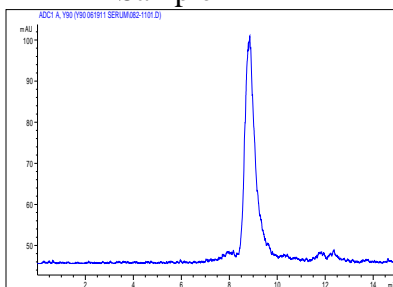

Sample 3

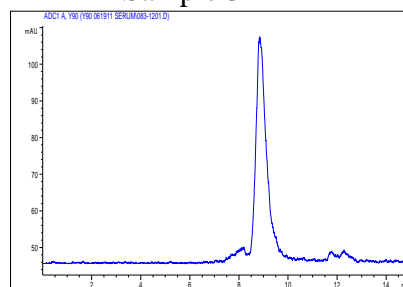

**211 hr**

Sample 1

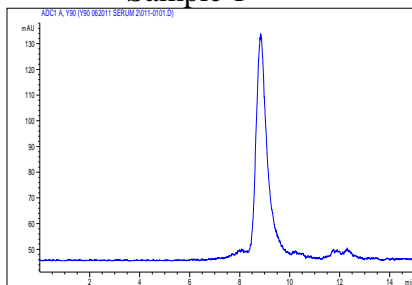

Sample 2

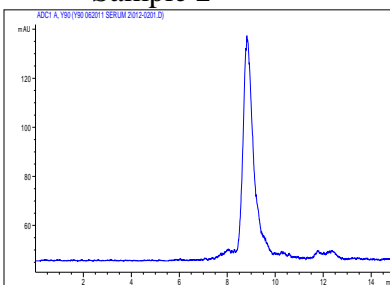

Sample 3

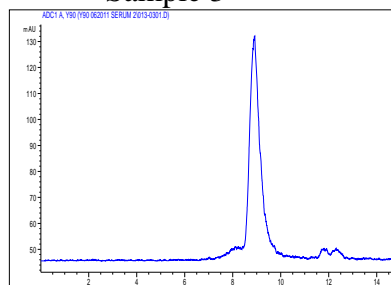

**234 hr**

Sample 1

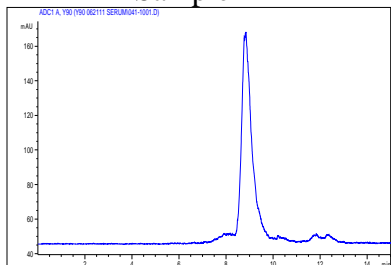

Sample 2

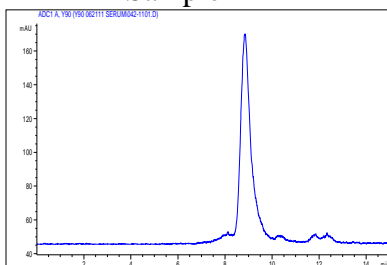

Sample 3

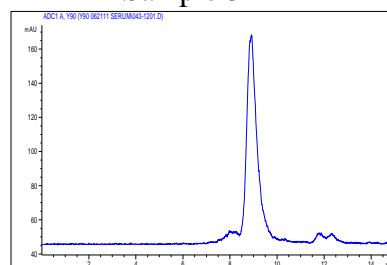

**259 hr**

Sample 1

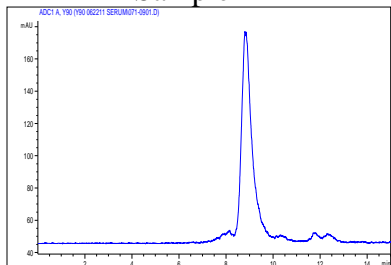

Sample 2

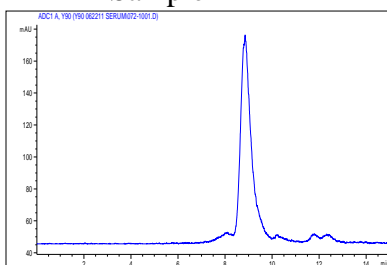

Sample 3

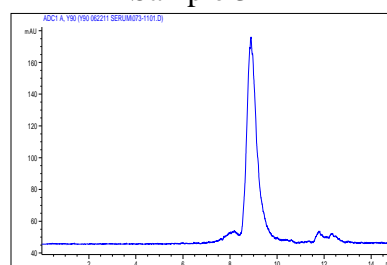

**285 hr**

Sample 1

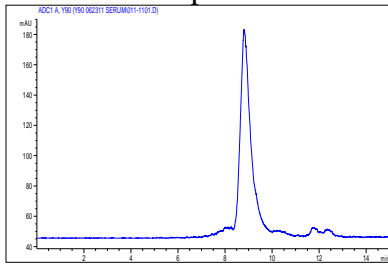

Sample 2

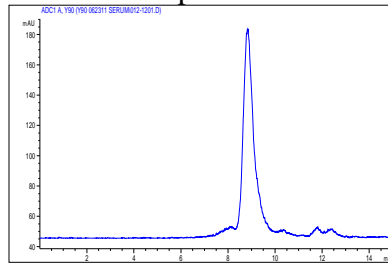

Sample 3

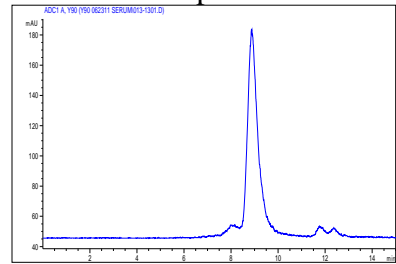

**306 hr**

Sample 1

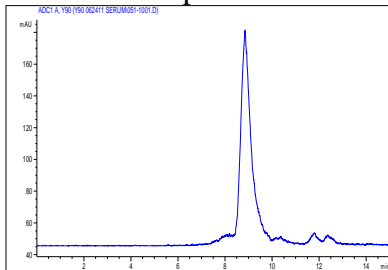

Sample 2

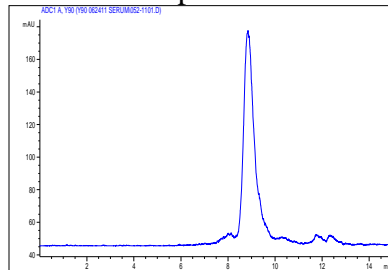

Sample 3

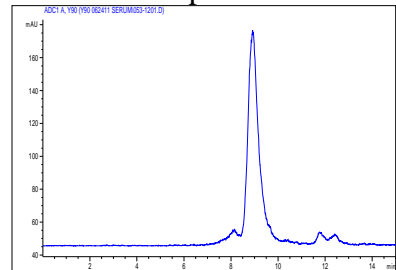

**329 hr**

Sample 1

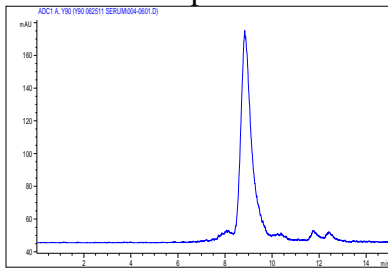

Sample 2

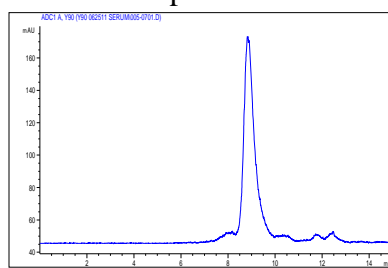

Sample 3

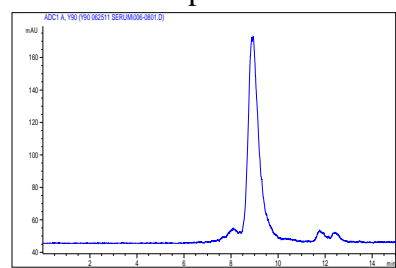

**362 hr**

Sample 1

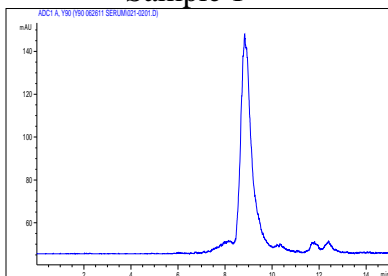

Sample 2

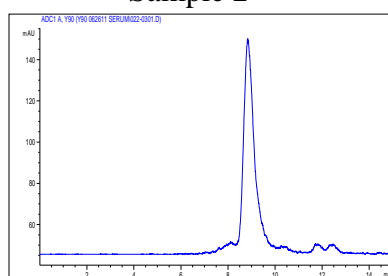

Sample 3

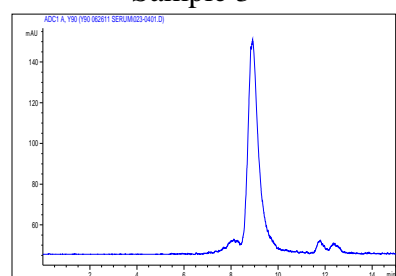

## 2. $^{177}\text{Lu}$ -radiolabeled ligand-trastuzumab conjugates

### i) $^{177}\text{Lu}$ -3p-C-NETA-trastuzumab

0 hr

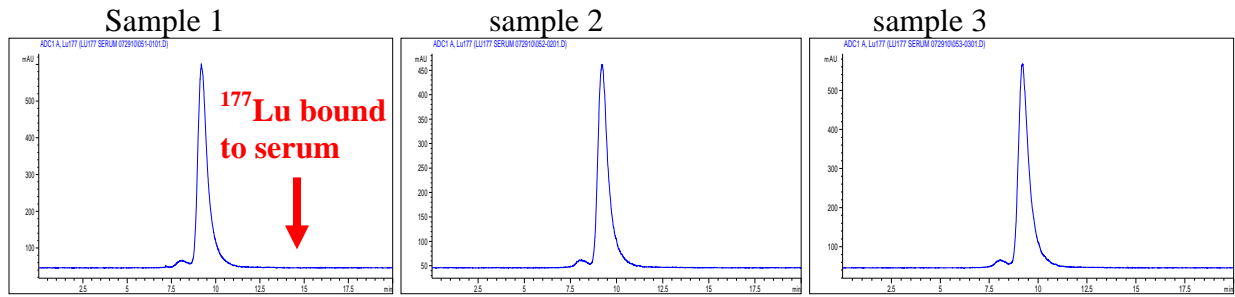

20 hr

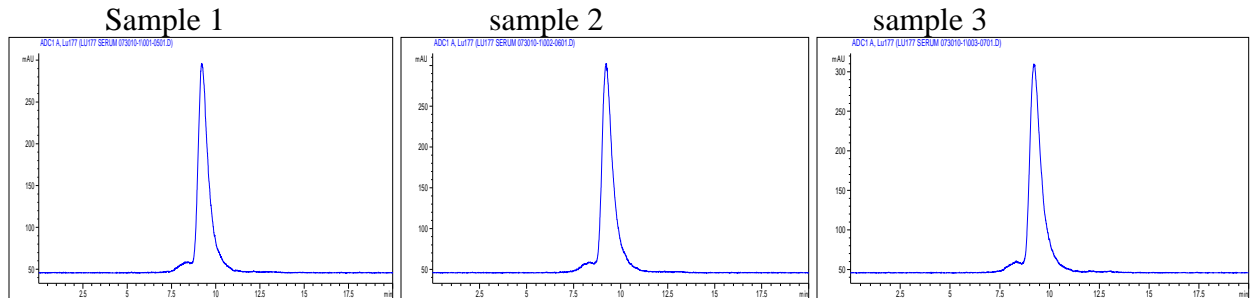

46 hr

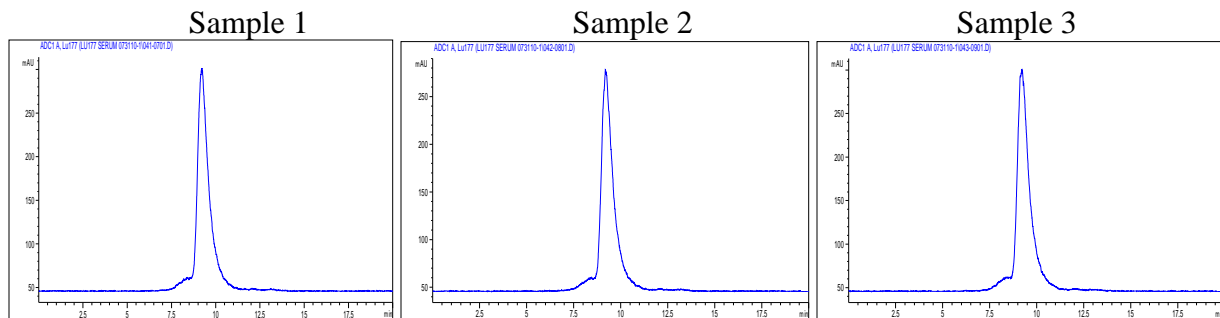

**66 hr**

**Sample 1**

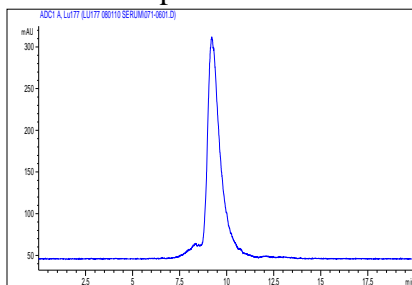

**sample 2**

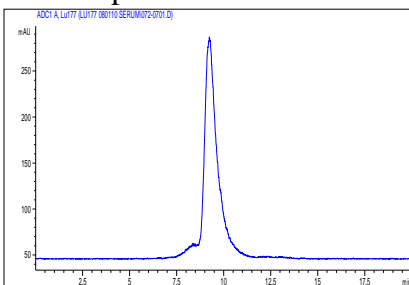

**sample 3**

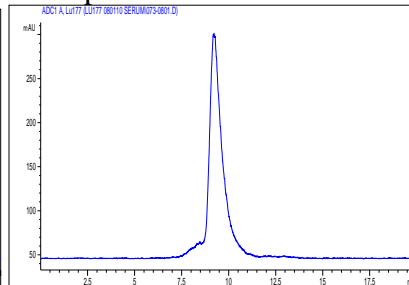

**92 hr**

**Sample 1**

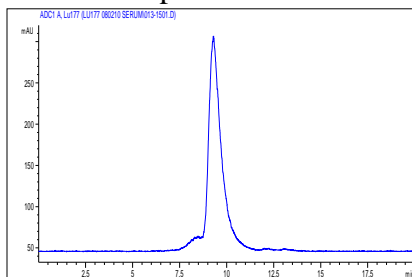

**sample 2**

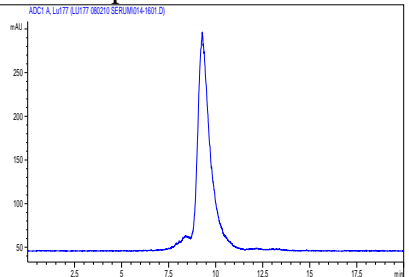

**sample 3**

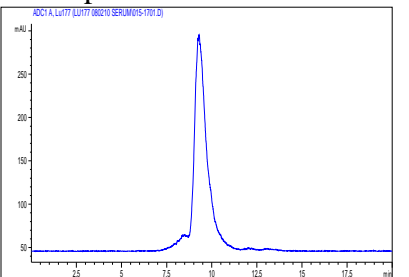

**105 hr**

**Sample 1**

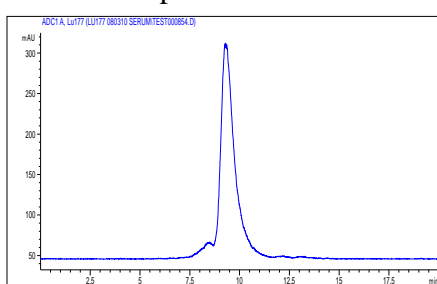

**sample 2**

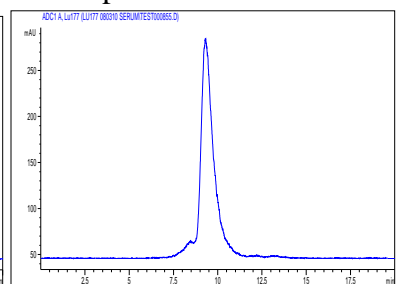

**sample 3**

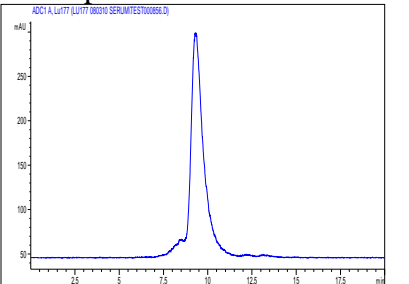

**127 hr**

**Sample 1**

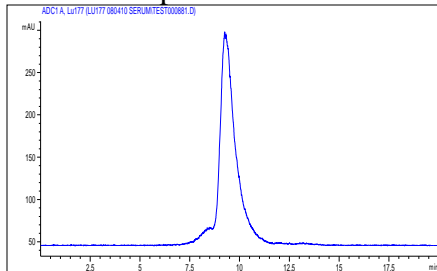

**Sample 2**

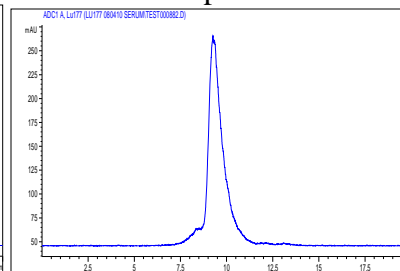

**Sample 3**

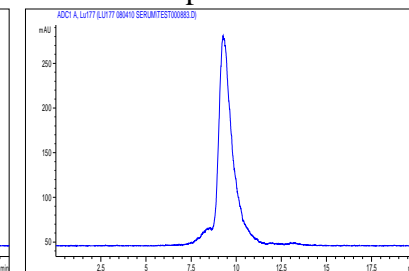

**151 hr**

Sample 1

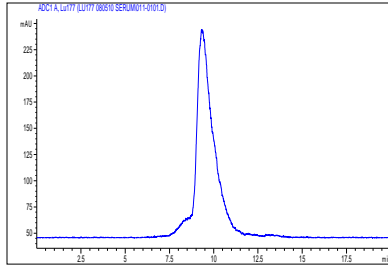

sample 2

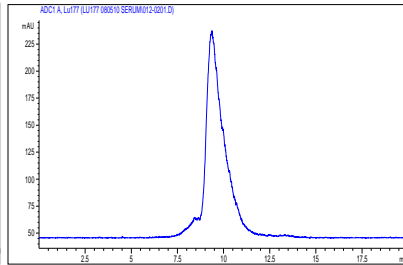

sample 3

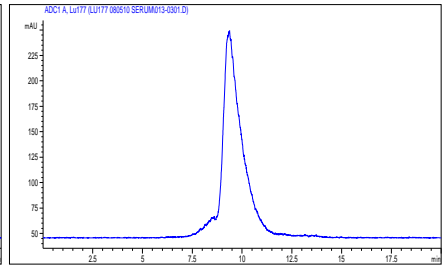

**174 hr**

Sample 1

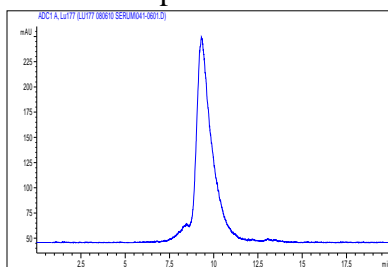

sample 2

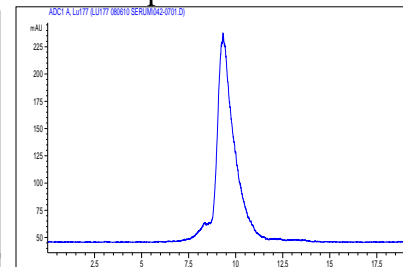

sample 3

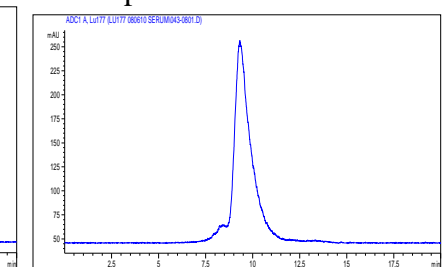

**198 hr**

Sample 1

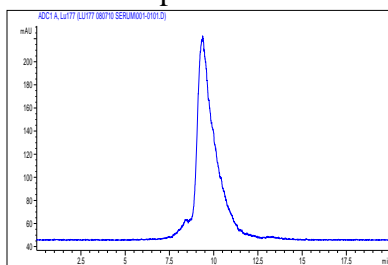

sample 2

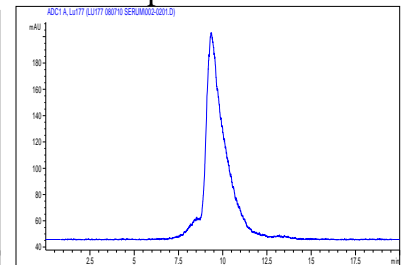

sample 3

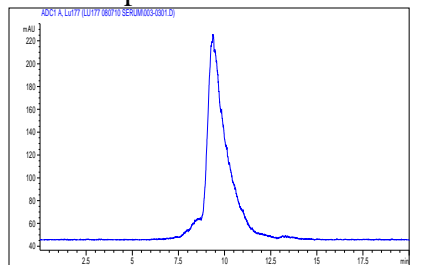

**225 hr**

Sample 1

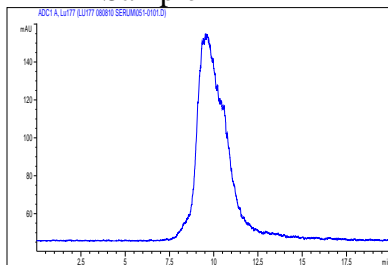

sample 2

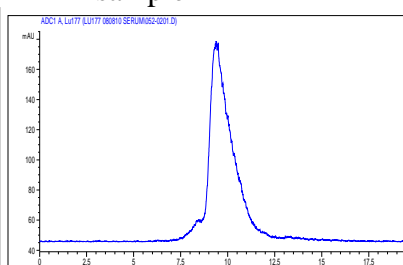

sample 3

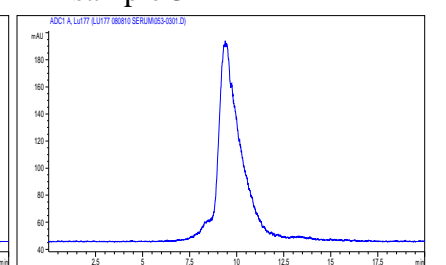

**252 hr**

**Sample 1**

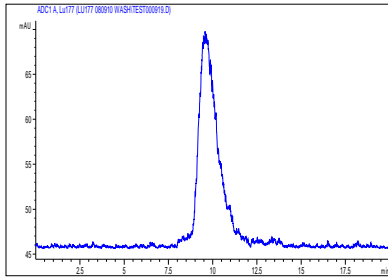

**sample 2**

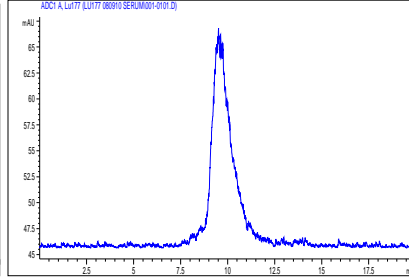

**sample 3**

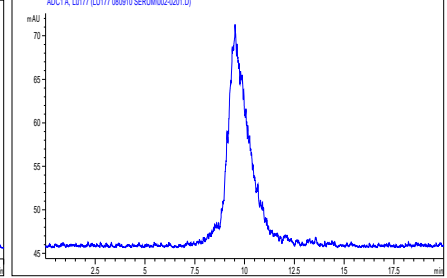

**273 hr**

**Sample 1**

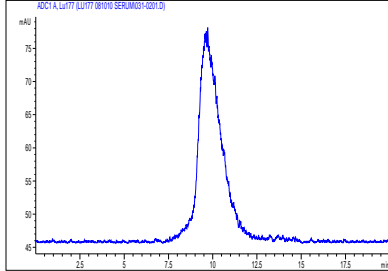

**sample 2**

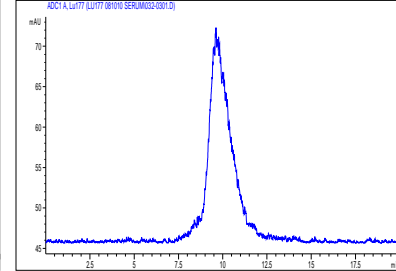

**Sample 3**

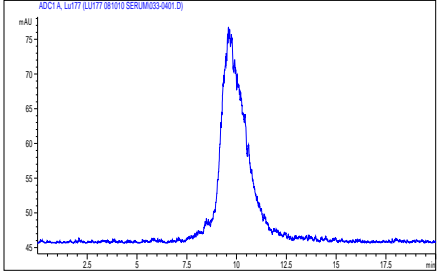

**299 hr**

**Sample 1**

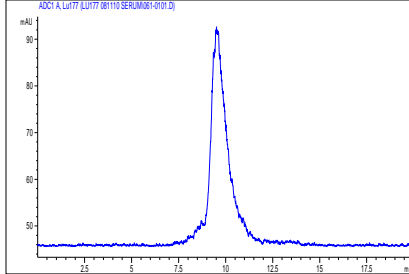

**sample 2**

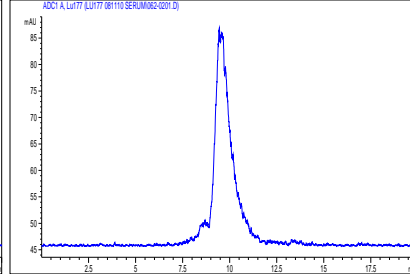

**sample 3**

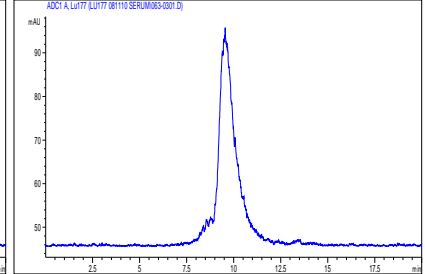

**322 hr**

**Sample 1**

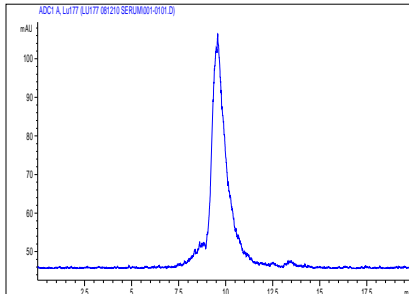

**sample 2**

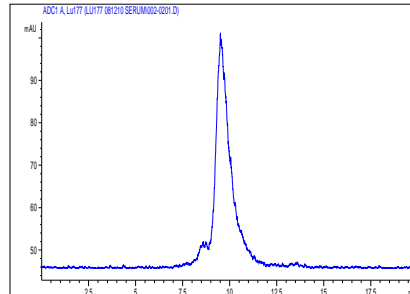

**sample 3**

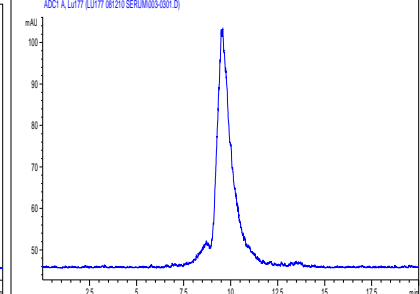

344 hr

Sample 1

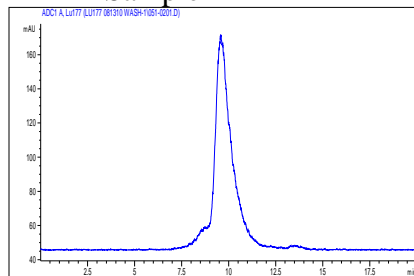

Sample 2

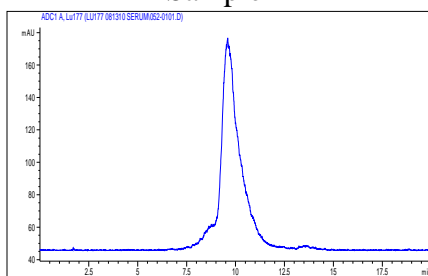

Sample 3

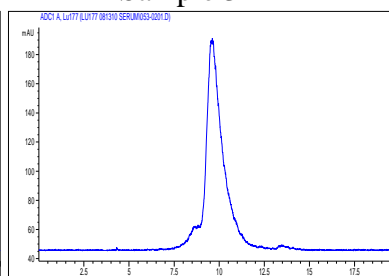

ii)  $^{177}\text{Lu}$ -3p-C-DEPA-trastuzumab

0 hr

Sample 1  
99.1%

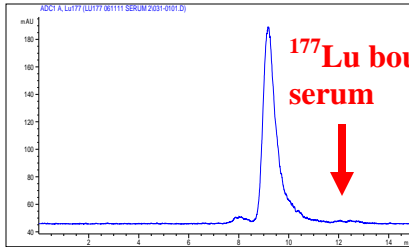

Sample 2  
98.7%

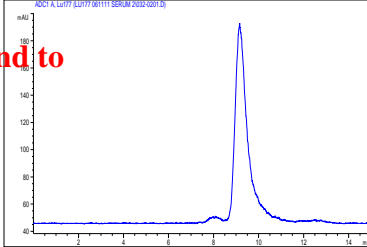

Sample 3  
98.7%

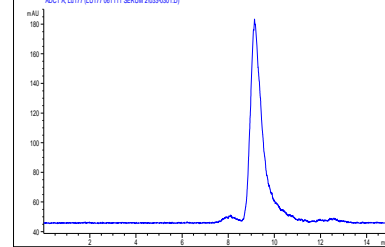

22 hr

Sample 1  
69.3%

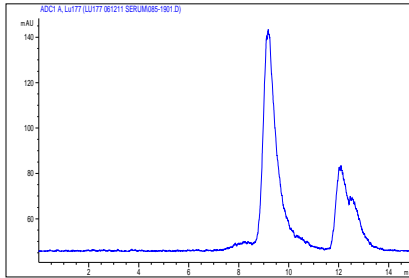

Sample 2  
68.9%

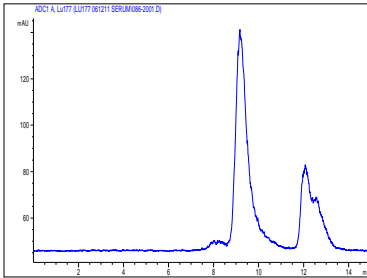

Sample 3  
68.3%

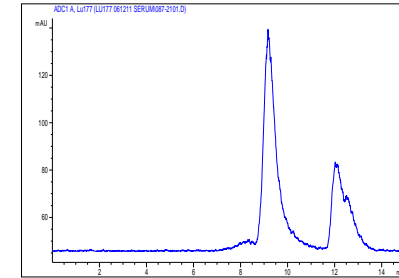

43 hr

Sample 1  
56.9%

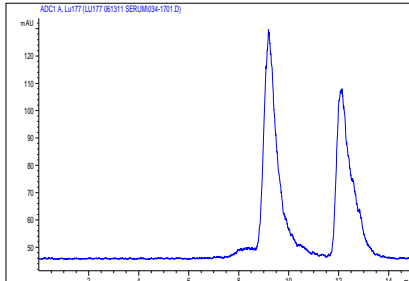

Sample 2  
56.9%

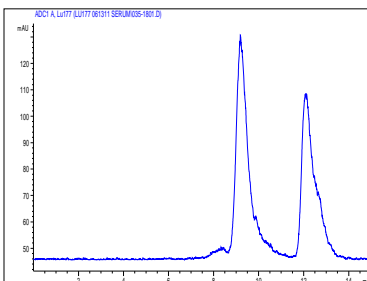

Sample 3  
55.8%

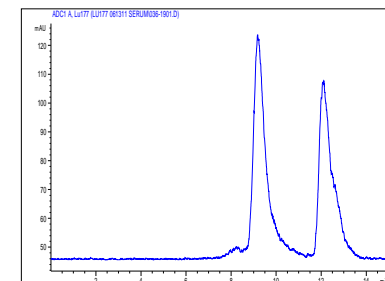



iii)  $^{177}\text{Lu}$ -C-DOTA-Trastuzumab

0 hr

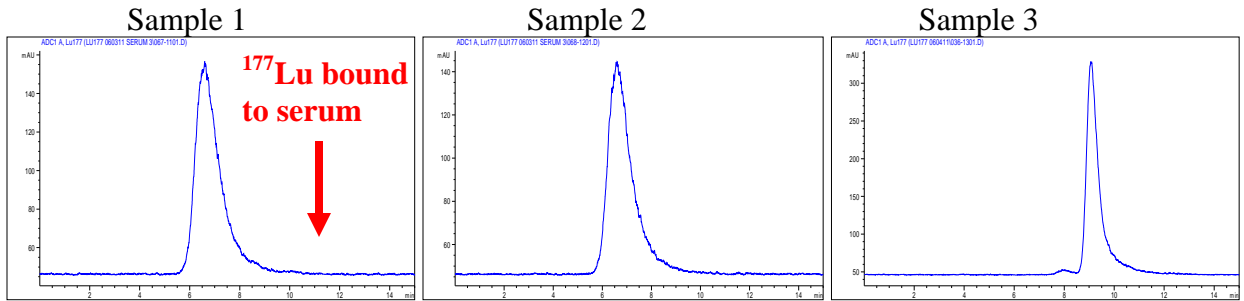

22 hr (samples 1 and 2), 20 hr (sample 3)

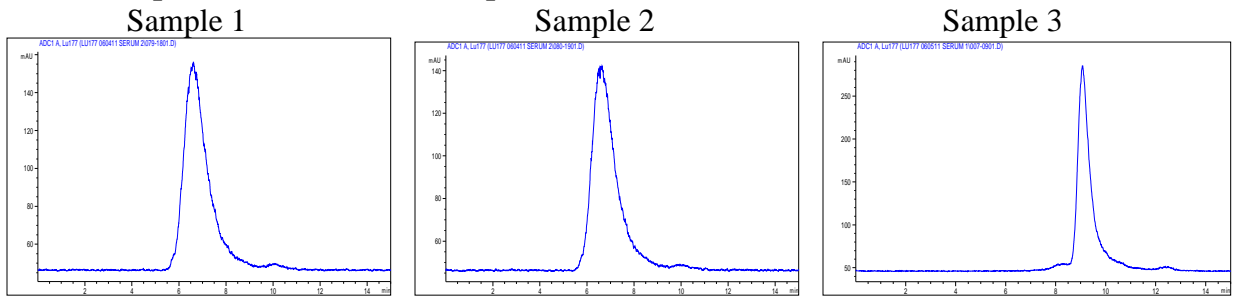

44 hr

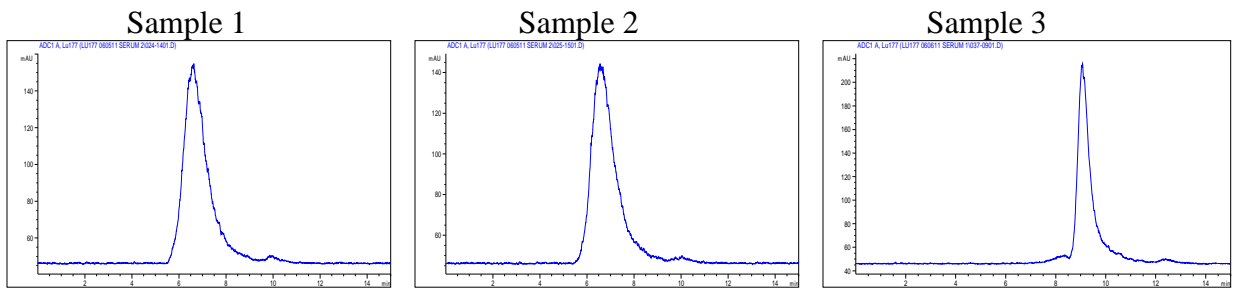

68 hr

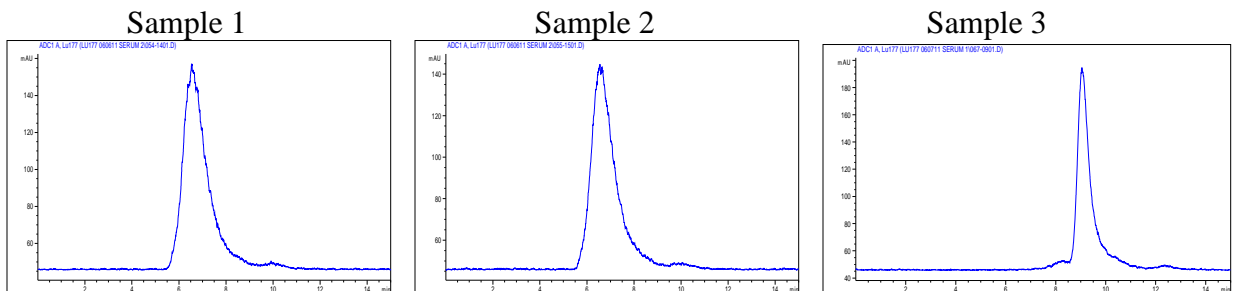

**92 hr (samples 1 and 2) and 93 hr (sample 3)**

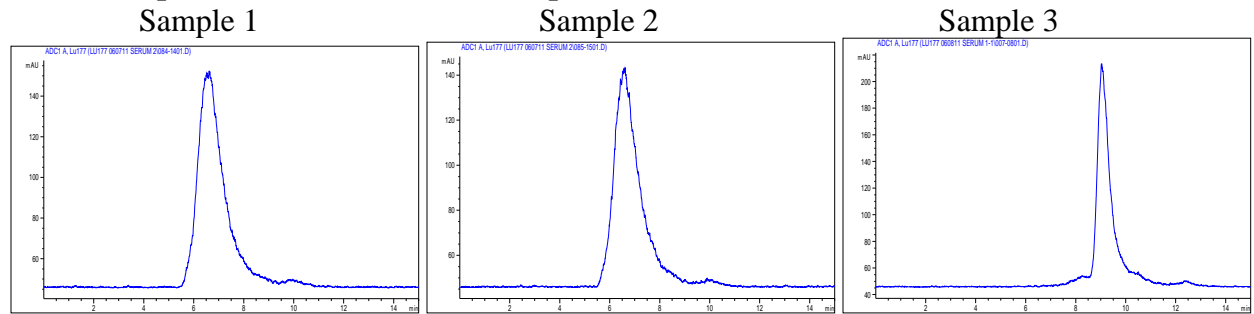

**131 hr (samples 1 and 2) and 117 hr (sample 3)**

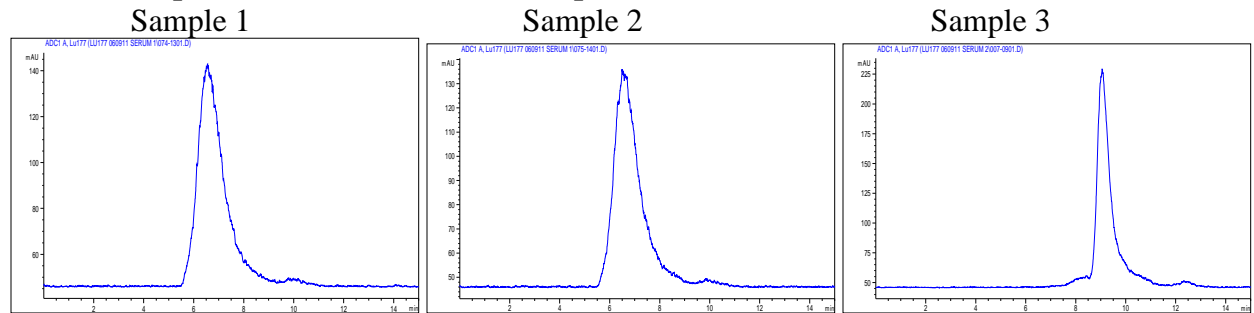

**143 hr (samples 1 and 2) and 147 hr (sample 3)**

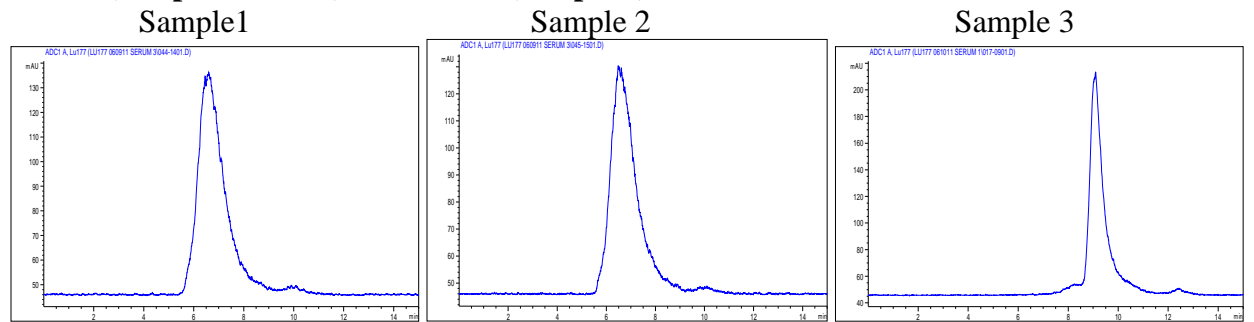

**171 hr (samples 1 and 2) and 175 hr (sample 3)**

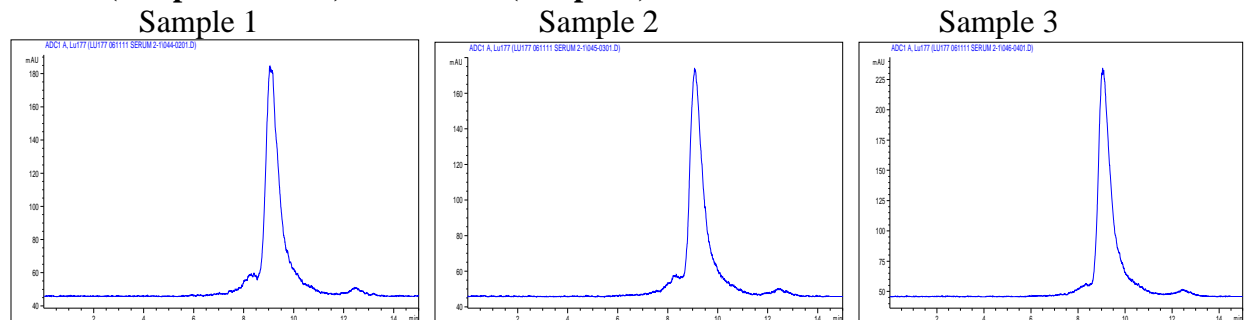

**193 hr (samples 1 and 2) and 197 hr (sample 3)**

Sample 1

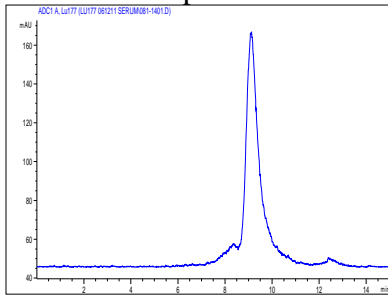

Sample 2

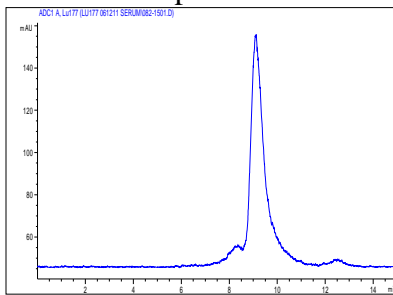

Sample 3

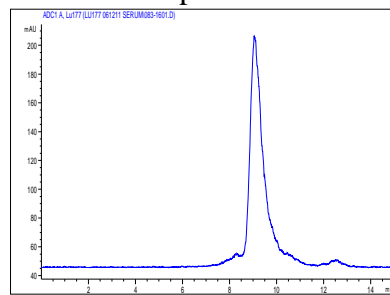

**214 hr (samples 1 and 2) and 218 hr (sample 3)**

Sample 1

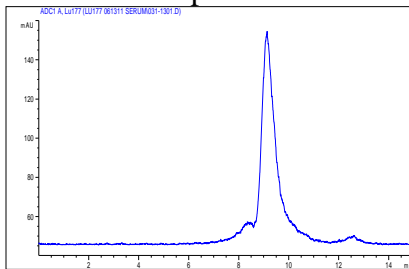

Sample 2

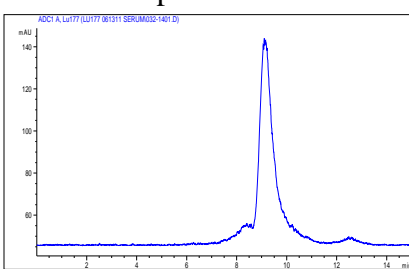

Sample 3

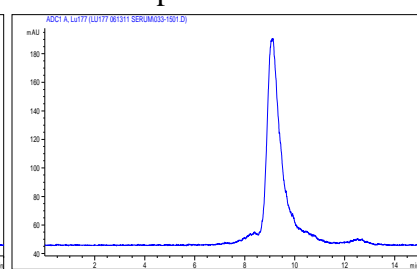

**237 hr (samples 1 and 2) and 241 hr (sample 3)**

Sample 1

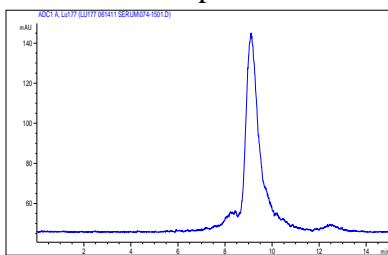

Sample 2

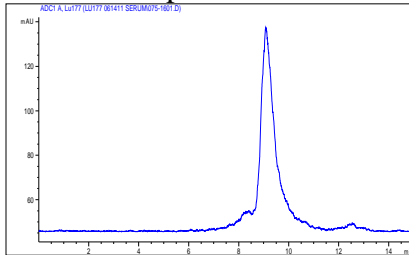

Sample 3

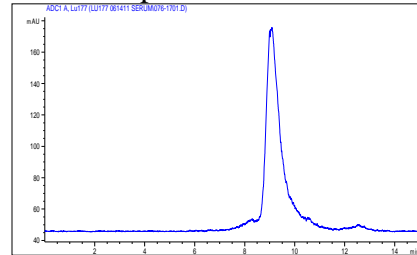

**261 hr (samples 1 and 2) and 265 hr (sample 3)**

Sample 1

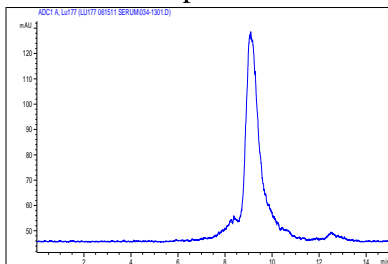

Sample 2

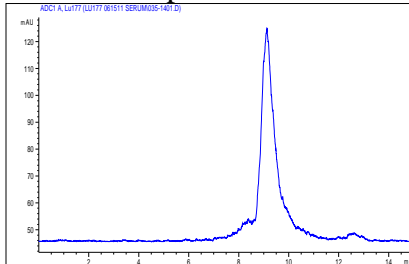

Sample 3

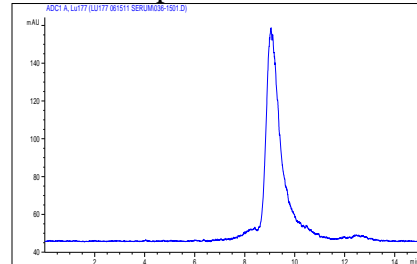

**285 hr (samples 1 and 2) and 289 hr (sample 3)**

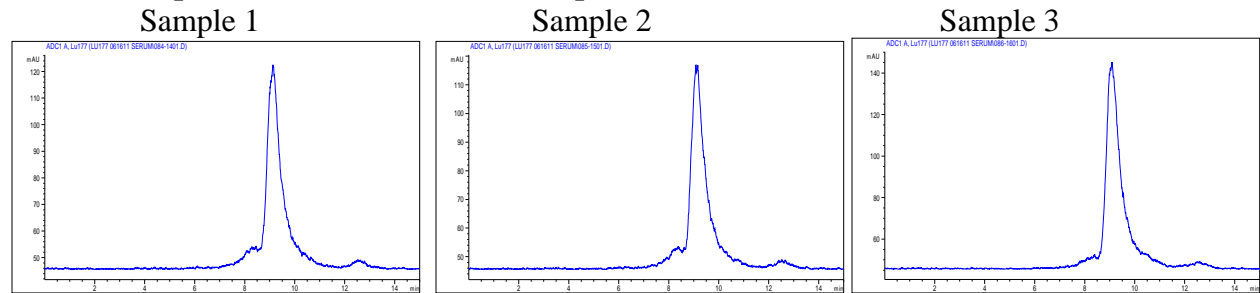

**322 hr (samples 1 and 2) and 326 hr (sample 3)**

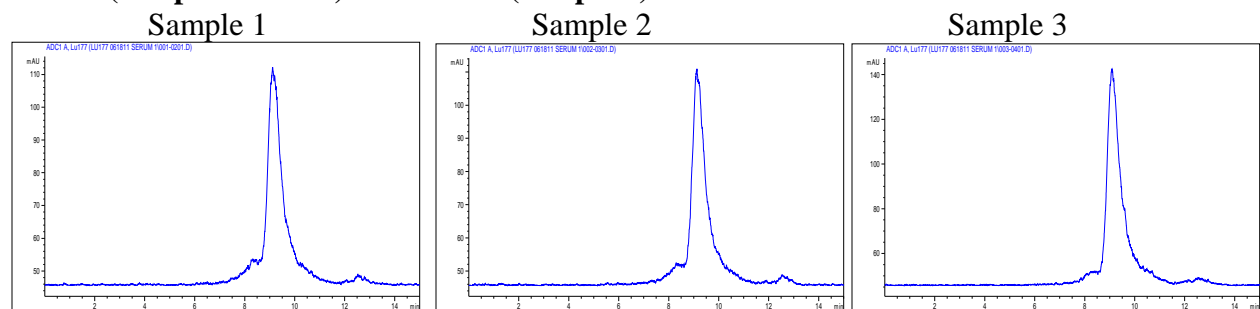

**355 hr (samples 1 and 2) and 359 hr (sample 3)**

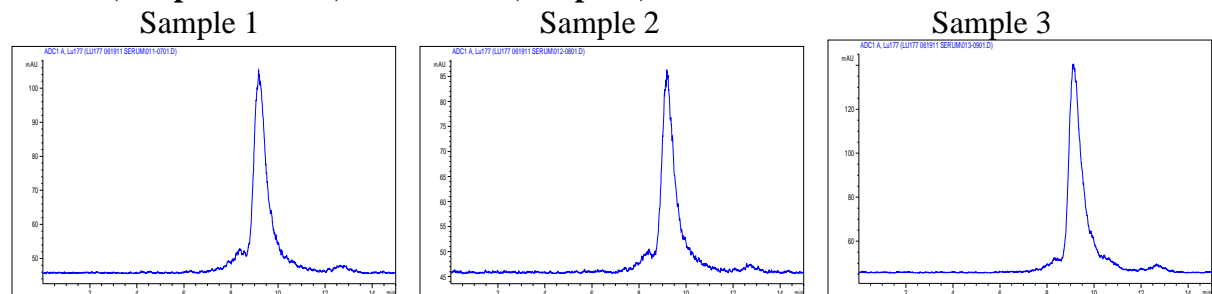

**C. *In vivo* biodistribution of <sup>177</sup>Lu-3p-C-NETA-trastuzumab conjugate in ZR-75-1-bearing mice (% ID/g, n = 3, intravenous injection)**

| Tissue | 24 h  |   |       | 72 h  |   |      | 120 h |   |      |
|--------|-------|---|-------|-------|---|------|-------|---|------|
| blood  | 14.57 | ± | 10.63 | 12.09 | ± | 1.12 | 1.58  | ± | 1.30 |
| liver  | 9.35  | ± | 6.85  | 5.09  | ± | 0.69 | 2.20  | ± | 0.06 |
| kidney | 3.50  | ± | 2.93  | 2.30  | ± | 0.69 | 1.09  | ± | 0.12 |
| bone   | 5.24  | ± | 6.66  | 0.85  | ± | 0.17 | 0.31  | ± | 0.28 |
| tumor  | 6.26  | ± | 3.57  | 10.55 | ± | 7.93 | 10.10 | ± | 0.45 |
